# Supplementary material for: A developmental basis for stochasticity in floral organ numbers
Source: Front Plant Sci. 2014 Nov 3;5:545. doi: 10.3389/fpls.2014.00545 (PMC4217355; doi:10.3389/fpls.2014.00545)
Supplement: Supplementary file 1 [file Table1.XLSX]

## Sheet: Published data
									Reference
Family	Genus	Species	Subspecies	Variety	Organ	Field	Country	Date	First author	Title	Year	Journal	Note	n	0	1	2	3	4	5	6	7	8	9	10	11	12	13	14	15	16	17	18	19	20	21	22	23	24	25	26	27	28	29	30	31	32	33	34
Asteraceae	Anthemis	arvensis			ray				Ludwig, F	Ueber Variationskurven und Variationsflaechen der pflanzen	1895	Botanisches Centralblatt		100	0	0	0	0	0	0	0	1	1	4	11	11	24	30	9	6	2	0	1	0	0	0	0	0	0	0	0	0	0	0	0	0	0	0	0
Asteraceae	Anthemis	arvensis			ray				Ludwig, F	Ueber Variationskurven und Variationsflaechen der pflanzen	1895	Botanisches Centralblatt	"main curve"	1802	0	0	2	2	27	119	121	191	371	214	143	122	158	157	61	29	26	11	14	17	8	9	0	0	0	0	0	0	0	0	0	0	0	0	0
Asteraceae	Anthemis	cotula			ray				Ludwig, F	Ueber Variationskurven und Variationsflaechen der pflanzen	1895	Botanisches Centralblatt		422	0	0	0	0	0	0	0	0	0	0	0	7	50	224	66	42	16	5	8	1	3	0	0	0	0	0	0	0	0	0	0	0	0	0	0
Asteraceae	Anthemis	cotula			ray				Ludwig, F	Ueber Variationskurven und Variationsflaechen der pflanzen	1895	Botanisches Centralblatt	stubble field	160	0	0	0	0	0	2	2	10	38	22	16	23	20	23	3	1	0	0	0	0	0	0	0	0	0	0	0	0	0	0	0	0	0	0	0
Asteraceae	Aster	fastigiatus			ray				Nakano	Variation and correlation in rays and disk florets of Aster fastigiatus	1910	Botanical Gazett		2959	0	0	0	0	0	0	0	0	0	0	1	4	32	103	183	317	511	541	471	303	177	135	59	48	43	17	10	2	2	0	0	0	0	0	0
Asteraceae	Aster	novae-anglia			ray	Yellow Springs	US	1900/9/30	Shull, George Harrison	A quantitative study of variation in the bracts, rays, and disk florets of aster shortii hook,	1902	The American Naturalist		199	0	0	0	0	0	0	0	0	0	0	0	0	0	0	0	0	0	0	0	0	0	0	0	0	0	0	0	0	0	1	1	4	2	4	6
Asteraceae	Aster	shortii			ray	Niagala limestone cliff	US	1900/9/26	Shull, George Harrison	A quantitative study of variation in the bracts, rays, and disk florets of aster shortii hook,	1902	The American Naturalist		226	0	0	0	0	0	0	0	0	0	0	0	1	22	86	45	38	17	11	4	1	0	1	0	0	0	0	0	0	0	0	0	0	0	0	0
Asteraceae	Callistephus	chinensis			ray				Fernando de Helguero	Varizione ed Omotiposi nelle infiorescenze di Cihorium Intybus L.	1906	Biometrika 5		1321	0	0	0	0	0	0	0	0	0	0	0	0	0	0	0	13	26	83	167	257	350	404	21	0	0	0	0	0	0	0	0	0	0	0	0
Asteraceae	Cichorium	intybus			ray				Fernando de Helguero	Varizione ed Omotiposi nelle infiorescenze di Cihorium Intybus L.	1906	Biometrika 5		300	0	0	0	0	0	0	0	0	1	5	13	80	98	76	16	7	3	1	0	0	0	0	0	0	0	0	0	0	0	0	0	0	0	0	0
Asteraceae	Cichorium	intybus			ray				Fernando de Helguero	Varizione ed Omotiposi nelle infiorescenze di Cihorium Intybus L.	1906	Biometrika 5		311	0	0	0	0	0	0	0	0	1	9	14	72	86	73	47	8	1	0	0	0	0	0	0	0	0	0	0	0	0	0	0	0	0	0	0
Asteraceae	Cichorium	intybus			ray				Fernando de Helguero	Varizione ed Omotiposi nelle infiorescenze di Cihorium Intybus L.	1906	Biometrika 5		389	0	0	0	0	0	0	0	0	2	7	28	107	126	84	27	7	1	0	0	0	0	0	0	0	0	0	0	0	0	0	0	0	0	0	0
Asteraceae	Coreopsis	tinctoria			ray			1893Jul-Aug	de Vries, Hugo	Ueber halbe Galton-Curve als Zeichen discontinuirlicher Variation	1894	Berichte der deutschen Botanischen Gesellschaft		495	0	0	0	1	0	2	13	49	311	76	28	12	3	0	0	0	0	0	0	0	0	0	0	0	0	0	0	0	0	0	0	0	0	0	0
Asteraceae	Cota	tinctoria			ray				Ludwig, F	Ueber Variationskurven und Variationsflaechen der pflanzen	1895	Botanisches Centralblatt		305	0	0	0	0	0	0	0	0	0	0	0	0	0	0	0	0	0	1	4	4	21	61	32	28	35	23	22	13	14	8	13	4	2	6	8
Asteraceae	Gaillardia	aristata			ray				Robbins, W. W.	Variation in flower-heads of Gaillardia aristata.	1908	Biometrika 6	Heads with both disk and ray florets	144	0	0	0	0	0	0	0	0	0	0	3	7	6	27	12	15	13	12	12	6	11	1	6	3	3	1	2	0	3	0	0	0	0	1	0
Asteraceae	Gaillardia	aristata			ray				Robbins, W. W.	Variation in flower-heads of Gaillardia aristata.	1908	Biometrika 6	Heads contain only ray flroets	350	0	0	0	0	0	0	0	0	0	1	5	16	27	95	40	31	41	33	21	14	10	7	6	2	1	0	0	0	0	0	0	0	0	0	0
Asteraceae	Glebionis	segetum			ray				Ludwig, F	Ueber Variationskurven und Variationsflaechen der pflanzen	1895	Botanisches Centralblatt		1000	0	0	0	0	0	0	0	1	6	3	25	46	141	529	129	47	30	15	12	8	6	2	0	0	0	0	0	0	0	0	0	0	0	0	0
Asteraceae	Leucanthemum	vulgare			ray				Ludwig, F	Ueber Variationskurven und Variationsflaechen der pflanzen	1895	Botanisches Centralblatt		274	0	0	0	0	0	0	0	0	0	0	0	0	0	0	0	0	0	0	0	1	8	29	11	13	13	12	9	16	10	16	13	16	18	15	33
Asteraceae	Leucanthemum	vulgare			ray				Ludwig, F	Ueber Variationskurven und Variationsflaechen der pflanzen	1895	Botanisches Centralblatt		700	0	0	0	0	0	0	0	0	0	0	0	0	0	0	0	0	0	0	4	8	27	106	62	52	44	38	44	28	17	25	31	41	33	60	62
Asteraceae	Leucanthemum	vulgare			ray			1890-1895	Ludwig, F	Ueber Variationskurven und Variationsflaechen der pflanzen	1895	Botanisches Centralblatt		10006	0	0	0	0	0	0	0	0	5	10	23	44	86	235	179	271	222	286	338	472	927	1964	1117	698	503	374	430	252	267	211	113	106	105	211	274
Asteraceae	Leucanthemum	vulgare			ray			1895July	K. P.	Variation in Ray-flowers of Chrysanthemum leucanthemum, 1133 heads gahtered at Keswick, July, 1895.	1902	Biometrika 1		1133	0	0	0	0	0	0	0	0	0	0	0	1	3	23	36	36	46	46	77	78	151	286	132	63	33	33	24	16	6	11	5	10	4	11	1
Asteraceae	Leucanthemum	vulgare			ray			1901/07/05	Tower, WL	Variation in the Ray-flowers of Chrysanthemum leucanthemum L. at Yellow Springs, Greene Co., O., with remarks upon the Determination of Modes.	1902	Biometrika 1		284	0	0	0	0	0	0	0	0	0	0	0	0	0	0	0	0	1	0	0	2	8	17	23	22	21	22	19	16	14	12	10	16	18	29	20
Asteraceae	Leucanthemum	vulgare			ray			1901/07/30	Tower, WL	Variation in the Ray-flowers of Chrysanthemum leucanthemum L. at Yellow Springs, Greene Co., O., with remarks upon the Determination of Modes.	1902	Biometrika 1		168	0	0	0	0	0	0	0	0	0	0	0	0	1	8	3	6	8	9	8	12	19	26	11	10	10	8	5	4	6	4	2	4	2	1	1
Asteraceae	Leucanthemum	vulgare			ray			by 1890	Ludwig, F	Ueber Variationskurven und Variationsflaechen der pflanzen	1895	Botanisches Centralblatt		6040	0	0	0	0	0	0	0	2	4	2	12	18	61	186	184	171	245	227	257	339	570	1508	583	404	258	195	149	102	98	65	68	67	67	85	69
Asteraceae	Leucanthemum	vulgare			ray	Massachusetts			Lucas, F. C.	Variation in the number of ray-flowers in the white daisy	1898	The American Naturalist		323	0	0	0	0	0	0	0	0	0	0	0	0	4	2	1	7	8	12	22	32	37	53	36	22	20	13	14	13	5	12	3	5	1	1	0
Asteraceae	Leucanthemum	vulgare			ray	Nova Scotia			Lucas, F. C.	Variation in the number of ray-flowers in the white daisy	1898	The American Naturalist		508	0	0	0	0	0	0	0	0	0	0	0	0	1	6	5	6	6	5	9	21	41	50	64	52	30	25	25	16	17	31	26	21	19	13	15
Asteraceae	Leucanthemum	vulgare		pinnatifidum	ray	Four miles east from Dexter	US	1932/5/17, 6/4, 6/23	Baten, William Dowell	Constancy in the number of lingulate flowers of Chrysanthemum leucanthemum, variety pinnatifidum, during the flowering season	1935	Biometrika		3000	0	0	0	0	0	0	0	0	0	0	0	0	3	142	286	332	390	374	367	348	319	335	56	22	12	5	4	4	0	1	0	0	0	0	0
Asteraceae	Microseris	bigelovii			pappus				Bachmann, Konrad	Pappus part number in annual species ofMicroseris (Compositae, Cichoriaceae)	1978	Plant Systematics and Evolution	PB25	435	0	0	0	0	4	410	21	0	0	0	0	0	0	0	0	0	0	0	0	0	0	0	0	0	0	0	0	0	0	0	0	0	0	0	0
Asteraceae	Microseris	douglasii	douglasii		pappus				Bachmann, Konrad	Pappus part number in annual species ofMicroseris (Compositae, Cichoriaceae)	1978	Plant Systematics and Evolution	PB26	2514	0	0	0	8	82	2400	17	3	4	0	0	0	0	0	0	0	0	0	0	0	0	0	0	0	0	0	0	0	0	0	0	0	0	0	0
Asteraceae	Microseris	douglasii	tenella		pappus				Bachmann, Konrad	Pappus part number in annual species ofMicroseris (Compositae, Cichoriaceae)	1978	Plant Systematics and Evolution	PB37	3119	0	0	0	0	25	3087	7	0	0	0	0	0	0	0	0	0	0	0	0	0	0	0	0	0	0	0	0	0	0	0	0	0	0	0	0
Asteraceae	Microseris	elegans			pappus				Bachmann, Konrad	Pappus part number in annual species ofMicroseris (Compositae, Cichoriaceae)	1978	Plant Systematics and Evolution	PB24	697	0	0	0	0	21	673	3	0	0	0	0	0	0	0	0	0	0	0	0	0	0	0	0	0	0	0	0	0	0	0	0	0	0	0	0
Asteraceae	Microseris	lindleyi			pappus				Bachmann, Konrad	Pappus part number in annual species ofMicroseris (Compositae, Cichoriaceae)	1978	Plant Systematics and Evolution	PB22	9534	0	0	0	0	18	8815	638	54	6	2	1	0	0	0	0	0	0	0	0	0	0	0	0	0	0	0	0	0	0	0	0	0	0	0	0
Asteraceae	Microseris	lindleyi			pappus				Bachmann, Konrad	Pappus part number in annual species ofMicroseris (Compositae, Cichoriaceae)	1978	Plant Systematics and Evolution	PB30	4097	0	0	0	0	17	4031	49	0	0	0	0	0	0	0	0	0	0	0	0	0	0	0	0	0	0	0	0	0	0	0	0	0	0	0	0
Asteraceae	Microseris	pygmaea			pappus				Bachmann, Konrad	Pappus part number in annual species ofMicroseris (Compositae, Cichoriaceae)	1978	Plant Systematics and Evolution	A-221+246	632	0	0	0	0	0	0	0	2	27	130	461	10	2	0	0	0	0	0	0	0	0	0	0	0	0	0	0	0	0	0	0	0	0	0	0
Asteraceae	Microseris	pygmaea × bigelovii			pappus				Bachmann, Konrad	Pappus part number in annual species ofMicroseris (Compositae, Cichoriaceae)	1978	Plant Systematics and Evolution	cross no. 1, percentage	NA	0	0	0	0	0	50	28	14	7	1	0	0	0	0	0	0	0	0	0	0	0	0	0	0	0	0	0	0	0	0	0	0	0	0	0
Asteraceae	Microseris	pygmaea × bigelovii			pappus				Bachmann, Konrad	Pappus part number in annual species ofMicroseris (Compositae, Cichoriaceae)	1978	Plant Systematics and Evolution	cross no. 2, percentage	NA	0	0	0	0	0	36	35	22	6	1	0	0	0	0	0	0	0	0	0	0	0	0	0	0	0	0	0	0	0	0	0	0	0	0	0
Asteraceae	Microseris	pygmaea × bigelovii			pappus				Bachmann, Konrad	Pappus part number in annual species ofMicroseris (Compositae, Cichoriaceae)	1978	Plant Systematics and Evolution	cross no. 3, percentage	NA	0	0	0	0	0	24	31	25	11	7	1	0	0	0	0	0	0	0	0	0	0	0	0	0	0	0	0	0	0	0	0	0	0	0	0
Asteraceae	Microseris	pygmaea × bigelovii			pappus				Bachmann, Konrad	Pappus part number in annual species ofMicroseris (Compositae, Cichoriaceae)	1978	Plant Systematics and Evolution	cross no. 4, percentage	NA	0	0	0	0	0	26	33	23	10	7	1	0	0	0	0	0	0	0	0	0	0	0	0	0	0	0	0	0	0	0	0	0	0	0	0
Asteraceae	Microseris	pygmaea × bigelovii			pappus				Bachmann, Konrad	Pappus part number in annual species ofMicroseris (Compositae, Cichoriaceae)	1978	Plant Systematics and Evolution	cross no. 5, percentage	NA	0	0	0	0	0	6	28	32	24	9	1	0	0	0	0	0	0	0	0	0	0	0	0	0	0	0	0	0	0	0	0	0	0	0	0
Asteraceae	Microseris	pygmaea × bigelovii			pappus				Bachmann, Konrad	Pappus part number in annual species ofMicroseris (Compositae, Cichoriaceae)	1978	Plant Systematics and Evolution	cross no. 6, percentage	NA	0	0	0	0	0	7	10	37	22	23	1	0	0	0	0	0	0	0	0	0	0	0	0	0	0	0	0	0	0	0	0	0	0	0	0
Asteraceae	Microseris	pygmaea × bigelovii			pappus				Bachmann, Konrad	Pappus part number in annual species ofMicroseris (Compositae, Cichoriaceae)	1978	Plant Systematics and Evolution	F2, 1, percentage	NA	0	0	0	0	0	0	0	5	26	34	36	0	0	0	0	0	0	0	0	0	0	0	0	0	0	0	0	0	0	0	0	0	0	0	0
Asteraceae	Microseris	pygmaea × bigelovii			pappus				Bachmann, Konrad	Pappus part number in annual species ofMicroseris (Compositae, Cichoriaceae)	1978	Plant Systematics and Evolution	F2, 2, percentage	NA	0	0	0	0	0	7	26	19	20	20	7	0	0	0	0	0	0	0	0	0	0	0	0	0	0	0	0	0	0	0	0	0	0	0	0
Asteraceae	Microseris	pygmaea × bigelovii			pappus				Bachmann, Konrad	Pappus part number in annual species ofMicroseris (Compositae, Cichoriaceae)	1978	Plant Systematics and Evolution	F2, 3, percentage	NA	0	0	0	0	0	24	20	23	14	13	6	0	0	0	0	0	0	0	0	0	0	0	0	0	0	0	0	0	0	0	0	0	0	0	0
Asteraceae	Microseris	pygmaea × bigelovii			pappus				Bachmann, Konrad	Pappus part number in annual species ofMicroseris (Compositae, Cichoriaceae)	1978	Plant Systematics and Evolution	F2, 4, percentage	NA	0	0	0	0	0	29	29	19	13	8	2	0	0	0	0	0	0	0	0	0	0	0	0	0	0	0	0	0	0	0	0	0	0	0	0
Asteraceae	Symphyotrichum	prenanthoides			ray	Clifton	US	10/4	Shull, George Harrison	A quantitative study of variation in the bracts, rays, and disk florets of aster shortii hook,	1902	The American Naturalist		139	0	0	0	0	0	0	0	0	0	0	0	0	0	0	0	0	0	0	0	0	1	3	2	10	11	11	4	15	16	13	8	12	15	11	4
Asteraceae	Symphyotrichum	prenanthoides			ray	Clifton	US	10/8	Shull, George Harrison	A quantitative study of variation in the bracts, rays, and disk florets of aster shortii hook,	1902	The American Naturalist		176	0	0	0	0	0	0	0	0	0	0	0	0	0	0	0	0	0	0	0	1	2	6	15	9	18	15	20	31	15	15	15	8	3	2	1
Asteraceae	Symphyotrichum	prenanthoides			ray	Clifton	US	1900/9-10	Shull, George Harrison	A quantitative study of variation in the bracts, rays, and disk florets of aster shortii hook,	1902	The American Naturalist		658	0	0	0	0	0	0	0	0	0	0	0	0	0	0	0	0	0	1	0	6	6	14	33	35	48	49	57	59	55	47	47	52	41	49	33
Asteraceae	Symphyotrichum	prenanthoides			ray	Clifton	US	9/27	Shull, George Harrison	A quantitative study of variation in the bracts, rays, and disk florets of aster shortii hook,	1902	The American Naturalist		117	0	0	0	0	0	0	0	0	0	0	0	0	0	0	0	0	0	0	0	0	0	0	1	2	4	9	8	6	7	5	5	12	10	14	18
Asteraceae	Symphyotrichum	prenanthoides			ray	Clifton	US	9/30	Shull, George Harrison	A quantitative study of variation in the bracts, rays, and disk florets of aster shortii hook,	1902	The American Naturalist		142	0	0	0	0	0	0	0	0	0	0	0	0	0	0	0	0	0	1	0	0	0	0	6	5	10	6	16	5	15	11	14	16	13	17	5
Asteraceae	Symphyotrichum	puniceum			ray	Yellow Springs	US	1900/9/25	Shull, George Harrison	A quantitative study of variation in the bracts, rays, and disk florets of aster shortii hook,	1902	The American Naturalist		798	0	0	0	0	0	0	0	0	0	0	0	0	0	0	0	0	0	0	0	0	0	0	0	0	2	1	3	10	9	17	25	31	33	57	67
Asteraceae	Tripleurospermum	inodorum			ray				Ludwig, F	Ueber Variationskurven und Variationsflaechen der pflanzen	1895	Botanisches Centralblatt		999	0	0	0	0	0	0	0	0	0	0	1	1	0	13	5	13	15	14	23	57	136	516	112	46	19	9	8	4	1	1	1	2	2	0	0
Caryophyllaceae	Stellaria	media			stamen				Burkill, I. H.	On some Variations in the Number of Stamens and Carpels	1895	Journal of the Asiatic Society of Bengal	G. staminodes are included into the number	227	0	0	2	94	65	56	8	1	1	0	0	0	0	0	0	0	0	0	0	0	0	0	0	0	0	0	0	0	0	0	0	0	0	0	0
Caryophyllaceae	Stellaria	media			stamen				Burkill, I. H.	On some Variations in the Number of Stamens and Carpels	1895	Journal of the Asiatic Society of Bengal	H. staminodes are included into the number	102	0	0	0	53	29	20	0	0	0	0	0	0	0	0	0	0	0	0	0	0	0	0	0	0	0	0	0	0	0	0	0	0	0	0	0
Caryophyllaceae	Stellaria	media			stamen				Burkill, I. H.	On some Variations in the Number of Stamens and Carpels	1895	Journal of the Asiatic Society of Bengal	I. staminodes are included into the number	49	0	0	1	23	11	12	2	0	0	0	0	0	0	0	0	0	0	0	0	0	0	0	0	0	0	0	0	0	0	0	0	0	0	0	0
Caryophyllaceae	Stellaria	media			stamen				Burkill, I. H.	On some Variations in the Number of Stamens and Carpels	1895	Journal of the Asiatic Society of Bengal	J&K. staminodes are included into the number	450	0	0	1	60	110	179	54	30	12	3	1	0	0	0	0	0	0	0	0	0	0	0	0	0	0	0	0	0	0	0	0	0	0	0	0
Caryophyllaceae	Stellaria	media			stamen				Burkill, I. H.	On some Variations in the Number of Stamens and Carpels	1895	Journal of the Asiatic Society of Bengal	L. staminodes are included into the number	60	0	1	1	30	16	4	3	1	2	1	1	0	0	0	0	0	0	0	0	0	0	0	0	0	0	0	0	0	0	0	0	0	0	0	0
Caryophyllaceae	Stellaria	media			stamen			Year?11Feb-26May	Burkill, I. H.	On some Variations in the Number of Stamens and Carpels	1895	Journal of the Asiatic Society of Bengal	B. staminodes are included into the number	560	0	1	17	353	105	51	15	8	7	1	2	0	0	0	0	0	0	0	0	0	0	0	0	0	0	0	0	0	0	0	0	0	0	0	0
Caryophyllaceae	Stellaria	media			stamen			year?13Apr-23Jun	Burkill, I. H.	On some Variations in the Number of Stamens and Carpels	1895	Journal of the Asiatic Society of Bengal	E&F. staminodes are included into the number	352	2	0	10	109	108	115	6	1	1	0	0	0	0	0	0	0	0	0	0	0	0	0	0	0	0	0	0	0	0	0	0	0	0	0	0
Caryophyllaceae	Stellaria	media			stamen			year?18Feb-23Jun	Burkill, I. H.	On some Variations in the Number of Stamens and Carpels	1895	Journal of the Asiatic Society of Bengal	D. staminodes are included into the number	1274	1	4	54	795	294	123	1	1	1	0	0	0	0	0	0	0	0	0	0	0	0	0	0	0	0	0	0	0	0	0	0	0	0	0	0
Caryophyllaceae	Stellaria	media			stamen			Year?4Feb-11Aug	Burkill, I. H.	On some Variations in the Number of Stamens and Carpels	1895	Journal of the Asiatic Society of Bengal	C. staminodes are included into the number	2100	0	1	31	784	554	582	91	39	8	8	2	0	0	0	0	0	0	0	0	0	0	0	0	0	0	0	0	0	0	0	0	0	0	0	0
Caryophyllaceae	Stellaria	media			stamen			Year?4Feb-26May	Burkill, I. H.	On some Variations in the Number of Stamens and Carpels	1895	Journal of the Asiatic Society of Bengal	A. staminodes are included into the number	510	0	0	18	282	98	95	7	6	1	2	1	0	0	0	0	0	0	0	0	0	0	0	0	0	0	0	0	0	0	0	0	0	0	0	0
Malvaceae	Hibiscus	syricacus			ovule			1905	Harris, J. Arthur	On the correlation between somatic characters and fertility: illustrations from the involucral whorl of Hibiscus	1911	Biometrika	number of ovules per locule	5000	0	0	3	5	63	365	2476	1334	754	0	0	0	0	0	0	0	0	0	0	0	0	0	0	0	0	0	0	0	0	0	0	0	0	0	0
Malvaceae	Hibiscus	syricacus			ovule			1905	Harris, J. Arthur	On the correlation between somatic characters and fertility: illustrations from the involucral whorl of Hibiscus	1911	Biometrika	total ovules per pod	1000	0	0	0	0	0	0	0	0	0	0	0	0	0	0	0	0	0	0	0	0	0	0	0	0	3	2	4	18	45	107	188	125	81	80	80
Malvaceae	Hibiscus	syricacus			ovule			1907	Harris, J. Arthur	On the correlation between somatic characters and fertility: illustrations from the involucral whorl of Hibiscus	1911	Biometrika	number of ovules per locule	16965	0	0	0	3	67	687	9799	4005	2359	45	0	0	0	0	0	0	0	0	0	0	0	0	0	0	0	0	0	0	0	0	0	0	0	0	0
Malvaceae	Hibiscus	syricacus			ovule			1907	Harris, J. Arthur	On the correlation between somatic characters and fertility: illustrations from the involucral whorl of Hibiscus	1911	Biometrika	total ovules per pod	3393	0	0	0	0	0	0	0	0	0	0	0	0	0	0	0	0	0	0	0	0	3	0	0	3	4	8	12	37	70	261	1025	379	272	247	205
Malvaceae	Hibiscus	syricacus			ovule			1908	Harris, J. Arthur	On the correlation between somatic characters and fertility: illustrations from the involucral whorl of Hibiscus	1911	Biometrika	A number of ovules per locule	7970	0	0	0	4	20	136	1171	2050	4321	243	25	0	0	0	0	0	0	0	0	0	0	0	0	0	0	0	0	0	0	0	0	0	0	0	0
Malvaceae	Hibiscus	syricacus			ovule			1908	Harris, J. Arthur	On the correlation between somatic characters and fertility: illustrations from the involucral whorl of Hibiscus	1911	Biometrika	A total ovules per pod	1594	0	0	0	0	0	0	0	0	0	0	0	0	0	0	0	0	0	0	0	0	0	0	0	0	0	0	0	7	7	22	57	48	60	71	68
Malvaceae	Hibiscus	syricacus			ovule			1908	Harris, J. Arthur	On the correlation between somatic characters and fertility: illustrations from the involucral whorl of Hibiscus	1911	Biometrika	B number of ovules per locule	3390	0	0	0	5	18	91	600	1098	1509	62	5	2	0	0	0	0	0	0	0	0	0	0	0	0	0	0	0	0	0	0	0	0	0	0	0
Malvaceae	Hibiscus	syricacus			ovule			1908	Harris, J. Arthur	On the correlation between somatic characters and fertility: illustrations from the involucral whorl of Hibiscus	1911	Biometrika	B total ovules per pod	565	0	0	0	0	0	0	0	0	0	0	0	0	0	0	0	0	0	0	0	0	0	0	0	0	0	0	0	0	0	0	0	1	5	2	6
Malvaceae	Hibiscus	syricacus			ovule			1908	Harris, J. Arthur	On the correlation between somatic characters and fertility: illustrations from the involucral whorl of Hibiscus	1911	Biometrika	number of ovules per locule	11820	0	0	1	0	11	234	7655	2643	1258	18	0	0	0	0	0	0	0	0	0	0	0	0	0	0	0	0	0	0	0	0	0	0	0	0	0
Malvaceae	Hibiscus	syricacus			ovule			1908	Harris, J. Arthur	On the correlation between somatic characters and fertility: illustrations from the involucral whorl of Hibiscus	1911	Biometrika	total ovules per pod	2364	0	0	0	0	0	0	0	0	0	0	0	0	0	0	0	0	0	0	0	0	0	0	1	0	0	3	5	4	22	88	875	335	263	160	142
Malvaceae	Hibiscus	syricacus			seeds			1905	Harris, J. Arthur	On the correlation between somatic characters and fertility: illustrations from the involucral whorl of Hibiscus	1911	Biometrika	number of seeds developing per locule	5000	105	365	669	921	1009	918	729	210	74	0	0	0	0	0	0	0	0	0	0	0	0	0	0	0	0	0	0	0	0	0	0	0	0	0	0
Malvaceae	Hibiscus	syricacus			seeds			1905	Harris, J. Arthur	On the correlation between somatic characters and fertility: illustrations from the involucral whorl of Hibiscus	1911	Biometrika	total number of seeds per pod	1000	0	0	4	5	3	6	14	14	23	20	21	35	23	42	51	37	51	44	42	58	47	55	39	50	53	48	36	40	38	25	20	21	10	9	5
Malvaceae	Hibiscus	syricacus			seeds			1907	Harris, J. Arthur	On the correlation between somatic characters and fertility: illustrations from the involucral whorl of Hibiscus	1911	Biometrika	number of seeds developing per locule	16965	1129	1839	2319	2535	2986	2975	2324	697	156	5	0	0	0	0	0	0	0	0	0	0	0	0	0	0	0	0	0	0	0	0	0	0	0	0	0
Malvaceae	Hibiscus	syricacus			seeds			1907	Harris, J. Arthur	On the correlation between somatic characters and fertility: illustrations from the involucral whorl of Hibiscus	1911	Biometrika	total number of seeds per pod	3393	5	20	57	74	80	98	81	95	103	88	84	88	84	82	120	129	128	121	118	96	151	142	141	152	177	151	162	123	113	101	71	53	39	26	19
Malvaceae	Hibiscus	syricacus			seeds			1908	Harris, J. Arthur	On the correlation between somatic characters and fertility: illustrations from the involucral whorl of Hibiscus	1911	Biometrika	A number of seeds developing per locule	7970	59	168	495	888	1397	1743	1632	1146	429	12	1	0	0	0	0	0	0	0	0	0	0	0	0	0	0	0	0	0	0	0	0	0	0	0	0
Malvaceae	Hibiscus	syricacus			seeds			1908	Harris, J. Arthur	On the correlation between somatic characters and fertility: illustrations from the involucral whorl of Hibiscus	1911	Biometrika	A total number of seeds per pod	1594	1	0	2	1	2	1	6	2	6	9	13	19	21	29	28	31	34	47	43	52	54	67	76	78	86	109	90	78	92	69	102	79	68	64	46
Malvaceae	Hibiscus	syricacus			seeds			1908	Harris, J. Arthur	On the correlation between somatic characters and fertility: illustrations from the involucral whorl of Hibiscus	1911	Biometrika	B number of seeds developing per locule	3390	26	97	240	468	620	749	658	402	129	1	0	0	0	0	0	0	0	0	0	0	0	0	0	0	0	0	0	0	0	0	0	0	0	0	0
Malvaceae	Hibiscus	syricacus			seeds			1908	Harris, J. Arthur	On the correlation between somatic characters and fertility: illustrations from the involucral whorl of Hibiscus	1911	Biometrika	B total number of seeds per pod	565	0	0	0	0	0	3	1	2	1	1	1	5	4	2	6	11	5	18	11	11	12	14	16	27	24	28	23	28	26	19	21	17	32	24	34
Malvaceae	Hibiscus	syricacus			seeds			1908	Harris, J. Arthur	On the correlation between somatic characters and fertility: illustrations from the involucral whorl of Hibiscus	1911	Biometrika	number of seeds developing per locule	11820	438	840	1307	1671	2178	2451	2122	662	150	1	0	0	0	0	0	0	0	0	0	0	0	0	0	0	0	0	0	0	0	0	0	0	0	0	0
Malvaceae	Hibiscus	syricacus			seeds			1908	Harris, J. Arthur	On the correlation between somatic characters and fertility: illustrations from the involucral whorl of Hibiscus	1911	Biometrika	total number of seeds per pod	2364	1	4	14	24	37	39	49	46	44	30	58	60	57	58	61	61	78	68	88	78	108	99	101	126	124	134	128	127	102	118	81	52	39	28	17
Oleaceae	Jasminum	multiflorum		alba	petal			1957/12/18-12/25	Roy, Subodh Kumar	The variation of organs of individual plants	1963	Journal of Genetics	Plant01	1278	0	0	0	0	0	3	45	374	661	185	10	0	0	0	0	0	0	0	0	0	0	0	0	0	0	0	0	0	0	0	0	0	0	0	0
Oleaceae	Jasminum	multiflorum		alba	petal			1957/12/18-12/25	Roy, Subodh Kumar	The variation of organs of individual plants	1963	Journal of Genetics	Plant02	868	0	0	0	0	0	2	17	219	451	165	14	0	0	0	0	0	0	0	0	0	0	0	0	0	0	0	0	0	0	0	0	0	0	0	0
Oleaceae	Jasminum	multiflorum		alba	petal			1958/01/03-01/10	Roy, Subodh Kumar	The variation of organs of individual plants	1963	Journal of Genetics	Plant01	1292	0	0	0	0	0	0	30	354	641	243	24	0	0	0	0	0	0	0	0	0	0	0	0	0	0	0	0	0	0	0	0	0	0	0	0
Oleaceae	Jasminum	multiflorum		alba	petal			1958/01/03-01/10	Roy, Subodh Kumar	The variation of organs of individual plants	1963	Journal of Genetics	Plant02	1133	0	0	0	0	0	0	17	253	574	266	22	1	0	0	0	0	0	0	0	0	0	0	0	0	0	0	0	0	0	0	0	0	0	0	0
Oleaceae	Jasminum	multiflorum		alba	petal			1958/01/20-01/27	Roy, Subodh Kumar	The variation of organs of individual plants	1963	Journal of Genetics	Plant01	182	0	0	0	0	0	0	0	59	95	25	3	0	0	0	0	0	0	0	0	0	0	0	0	0	0	0	0	0	0	0	0	0	0	0	0
Oleaceae	Jasminum	multiflorum		alba	petal			1958/01/20-01/27	Roy, Subodh Kumar	The variation of organs of individual plants	1963	Journal of Genetics	Plant02	422	0	0	0	0	0	0	15	112	201	85	9	0	0	0	0	0	0	0	0	0	0	0	0	0	0	0	0	0	0	0	0	0	0	0	0
Oleaceae	Jasminum	multiflorum		alba	petal			1958/02/05-02/13	Roy, Subodh Kumar	The variation of organs of individual plants	1963	Journal of Genetics	Plant02	302	0	0	0	0	0	0	14	110	139	38	1	0	0	0	0	0	0	0	0	0	0	0	0	0	0	0	0	0	0	0	0	0	0	0	0
Oleaceae	Jasminum	multiflorum		rubscens	petal			1958/02/10-02/25	Roy, Subodh Kumar	The variation of organs of individual plants	1963	Journal of Genetics	Plant01	1484	0	0	0	0	0	0	0	0	19	269	683	437	72	4	0	0	0	0	0	0	0	0	0	0	0	0	0	0	0	0	0	0	0	0	0
Oleaceae	Jasminum	multiflorum		rubscens	petal			1958/02/10-02/25	Roy, Subodh Kumar	The variation of organs of individual plants	1963	Journal of Genetics	Plant02	1061	0	0	0	0	0	0	0	0	7	180	511	302	58	3	0	0	0	0	0	0	0	0	0	0	0	0	0	0	0	0	0	0	0	0	0
Oleaceae	Jasminum	multiflorum		rubscens	petal			1958/02/26-03/13	Roy, Subodh Kumar	The variation of organs of individual plants	1963	Journal of Genetics	Plant01	1357	0	0	0	0	0	0	0	0	30	300	613	335	75	4	0	0	0	0	0	0	0	0	0	0	0	0	0	0	0	0	0	0	0	0	0
Oleaceae	Jasminum	multiflorum		rubscens	petal			1958/02/26-03/13	Roy, Subodh Kumar	The variation of organs of individual plants	1963	Journal of Genetics	Plant02	971	0	0	0	0	0	0	0	0	21	184	404	295	61	6	0	0	0	0	0	0	0	0	0	0	0	0	0	0	0	0	0	0	0	0	0
Oleaceae	Jasminum	multiflorum		rubscens	petal			1958/03/14-03/29	Roy, Subodh Kumar	The variation of organs of individual plants	1963	Journal of Genetics	Plant01	3254	0	0	0	0	0	0	0	0	53	667	1482	868	175	9	0	0	0	0	0	0	0	0	0	0	0	0	0	0	0	0	0	0	0	0	0
Oleaceae	Jasminum	multiflorum		rubscens	petal			1958/03/14-03/29	Roy, Subodh Kumar	The variation of organs of individual plants	1963	Journal of Genetics	Plant02	1640	0	0	0	0	0	0	0	0	30	403	759	389	58	1	0	0	0	0	0	0	0	0	0	0	0	0	0	0	0	0	0	0	0	0	0
Oleaceae	Jasminum	multiflorum		rubscens	petal			1958/03/30-04/14	Roy, Subodh Kumar	The variation of organs of individual plants	1963	Journal of Genetics	Plant01	1374	0	0	0	0	0	0	0	0	26	303	631	353	59	2	0	0	0	0	0	0	0	0	0	0	0	0	0	0	0	0	0	0	0	0	0
Oleaceae	Jasminum	multiflorum		rubscens	petal			1958/03/30-04/14	Roy, Subodh Kumar	The variation of organs of individual plants	1963	Journal of Genetics	Plant02	1663	0	0	0	0	0	0	0	0	37	343	774	428	73	8	0	0	0	0	0	0	0	0	0	0	0	0	0	0	0	0	0	0	0	0	0
Oleaceae	Jasminum	multiflorum		rubscens	petal			1958/04/15-04/30	Roy, Subodh Kumar	The variation of organs of individual plants	1963	Journal of Genetics	Plant01	283	0	0	0	0	0	0	0	0	5	51	119	74	22	6	4	1	1	0	0	0	0	0	0	0	0	0	0	0	0	0	0	0	0	0	0
Oleaceae	Jasminum	multiflorum		rubscens	petal			1958/04/15-04/30	Roy, Subodh Kumar	The variation of organs of individual plants	1963	Journal of Genetics	Plant02	313	0	0	0	0	0	0	0	0	9	63	127	86	25	1	2	0	0	0	0	0	0	0	0	0	0	0	0	0	0	0	0	0	0	0	0
Oleaceae	Jasminum	multiflorum		rubscens	petal			1958/05/01-05/16	Roy, Subodh Kumar	The variation of organs of individual plants	1963	Journal of Genetics	Plant01	231	0	0	0	0	0	0	0	0	7	35	94	50	28	5	7	0	1	1	0	1	0	2	0	0	0	0	0	0	0	0	0	0	0	0	0
Oleaceae	Jasminum	multiflorum		rubscens	petal			1958/05/01-05/16	Roy, Subodh Kumar	The variation of organs of individual plants	1963	Journal of Genetics	Plant02	475	0	0	0	0	0	0	0	0	4	100	188	138	38	5	2	0	0	0	0	0	0	0	0	0	0	0	0	0	0	0	0	0	0	0	0
Oleaceae	Jasminum	multiflorum		rubscens	petal			1958/05/17-06/01	Roy, Subodh Kumar	The variation of organs of individual plants	1963	Journal of Genetics	Plant01	883	0	0	0	0	0	0	0	0	14	204	386	218	51	7	1	0	1	0	0	0	1	0	0	0	0	0	0	0	0	0	0	0	0	0	0
Oleaceae	Jasminum	multiflorum		rubscens	petal			1958/05/17-06/01	Roy, Subodh Kumar	The variation of organs of individual plants	1963	Journal of Genetics	Plant02	197	0	0	0	0	0	0	0	0	5	48	93	42	8	1	0	0	0	0	0	0	0	0	0	0	0	0	0	0	0	0	0	0	0	0	0
Oleaceae	Jasminum	multiflorum		rubscens	petal			1958/06/02-06/17	Roy, Subodh Kumar	The variation of organs of individual plants	1963	Journal of Genetics	Plant01	455	0	0	0	0	0	0	0	0	13	90	209	116	23	2	0	0	0	0	2	0	0	0	0	0	0	0	0	0	0	0	0	0	0	0	0
Oleaceae	Jasminum	multiflorum		rubscens	petal			1958/06/02-06/17	Roy, Subodh Kumar	The variation of organs of individual plants	1963	Journal of Genetics	Plant02	176	0	0	0	0	0	0	0	0	6	45	75	39	9	1	0	0	0	0	1	0	0	0	0	0	0	0	0	0	0	0	0	0	0	0	0
Oleaceae	Nyctanthes	arbor-tristis			petal			1955/09/26-10/10	Roy, Subodh Kumar	The variation of organs of individual plants	1963	Journal of Genetics	Tree01	4485	0	0	0	0	8	597	3541	328	11	0	0	0	0	0	0	0	0	0	0	0	0	0	0	0	0	0	0	0	0	0	0	0	0	0	0
Oleaceae	Nyctanthes	arbor-tristis			petal			1955/09/26-10/10	Roy, Subodh Kumar	The variation of organs of individual plants	1963	Journal of Genetics	Tree02	3480	0	0	0	0	0	278	2739	442	21	0	0	0	0	0	0	0	0	0	0	0	0	0	0	0	0	0	0	0	0	0	0	0	0	0	0
Oleaceae	Nyctanthes	arbor-tristis			petal			1955/09/26-10/10	Roy, Subodh Kumar	The variation of organs of individual plants	1963	Journal of Genetics	Tree03	2994	0	0	0	0	1	386	2171	421	15	0	0	0	0	0	0	0	0	0	0	0	0	0	0	0	0	0	0	0	0	0	0	0	0	0	0
Oleaceae	Nyctanthes	arbor-tristis			petal			1955/10/11-10/25	Roy, Subodh Kumar	The variation of organs of individual plants	1963	Journal of Genetics	Tree01	7770	0	0	0	0	7	911	6046	780	26	0	0	0	0	0	0	0	0	0	0	0	0	0	0	0	0	0	0	0	0	0	0	0	0	0	0
Oleaceae	Nyctanthes	arbor-tristis			petal			1955/10/11-10/25	Roy, Subodh Kumar	The variation of organs of individual plants	1963	Journal of Genetics	Tree02	7976	0	0	0	0	0	368	6080	1421	103	4	0	0	0	0	0	0	0	0	0	0	0	0	0	0	0	0	0	0	0	0	0	0	0	0	0
Oleaceae	Nyctanthes	arbor-tristis			petal			1955/10/11-10/25	Roy, Subodh Kumar	The variation of organs of individual plants	1963	Journal of Genetics	Tree03	6293	0	0	0	0	2	941	4211	1098	41	0	0	0	0	0	0	0	0	0	0	0	0	0	0	0	0	0	0	0	0	0	0	0	0	0	0
Oleaceae	Nyctanthes	arbor-tristis			petal			1955/10/26-11/09	Roy, Subodh Kumar	The variation of organs of individual plants	1963	Journal of Genetics	Tree01	5880	0	0	0	0	7	857	4464	534	18	0	0	0	0	0	0	0	0	0	0	0	0	0	0	0	0	0	0	0	0	0	0	0	0	0	0
Oleaceae	Nyctanthes	arbor-tristis			petal			1955/10/26-11/09	Roy, Subodh Kumar	The variation of organs of individual plants	1963	Journal of Genetics	Tree02	7735	0	0	0	0	2	848	5774	1053	58	0	0	0	0	0	0	0	0	0	0	0	0	0	0	0	0	0	0	0	0	0	0	0	0	0	0
Oleaceae	Nyctanthes	arbor-tristis			petal			1955/10/26-11/09	Roy, Subodh Kumar	The variation of organs of individual plants	1963	Journal of Genetics	Tree03	2932	0	0	0	0	2	817	1791	312	10	0	0	0	0	0	0	0	0	0	0	0	0	0	0	0	0	0	0	0	0	0	0	0	0	0	0
Oleaceae	Nyctanthes	arbor-tristis			petal			1955/11/10-11/24	Roy, Subodh Kumar	The variation of organs of individual plants	1963	Journal of Genetics	Tree01	7452	0	0	0	0	34	1593	5287	518	20	0	0	0	0	0	0	0	0	0	0	0	0	0	0	0	0	0	0	0	0	0	0	0	0	0	0
Oleaceae	Nyctanthes	arbor-tristis			petal			1955/11/10-11/24	Roy, Subodh Kumar	The variation of organs of individual plants	1963	Journal of Genetics	Tree02	7810	0	0	0	0	13	1137	5604	1002	54	0	0	0	0	0	0	0	0	0	0	0	0	0	0	0	0	0	0	0	0	0	0	0	0	0	0
Oleaceae	Nyctanthes	arbor-tristis			petal			1955/11/10-11/24	Roy, Subodh Kumar	The variation of organs of individual plants	1963	Journal of Genetics	Tree03	648	0	0	0	0	1	213	393	41	0	0	0	0	0	0	0	0	0	0	0	0	0	0	0	0	0	0	0	0	0	0	0	0	0	0	0
Oleaceae	Nyctanthes	arbor-tristis			petal			1955/11/25-12/09	Roy, Subodh Kumar	The variation of organs of individual plants	1963	Journal of Genetics	Tree01	2884	0	0	0	0	23	641	1984	226	10	0	0	0	0	0	0	0	0	0	0	0	0	0	0	0	0	0	0	0	0	0	0	0	0	0	0
Oleaceae	Nyctanthes	arbor-tristis			petal			1955/11/25-12/09	Roy, Subodh Kumar	The variation of organs of individual plants	1963	Journal of Genetics	Tree02	4703	0	0	0	0	15	850	3214	595	27	2	0	0	0	0	0	0	0	0	0	0	0	0	0	0	0	0	0	0	0	0	0	0	0	0	0
Oleaceae	Nyctanthes	arbor-tristis			petal			1955/11/25-12/09	Roy, Subodh Kumar	The variation of organs of individual plants	1963	Journal of Genetics	Tree03	434	0	0	0	0	1	97	279	56	1	0	0	0	0	0	0	0	0	0	0	0	0	0	0	0	0	0	0	0	0	0	0	0	0	0	0
Oleaceae	Nyctanthes	arbor-tristis			petal			1955/12/10-12/24	Roy, Subodh Kumar	The variation of organs of individual plants	1963	Journal of Genetics	Tree01	785	0	0	0	0	7	151	537	86	4	0	0	0	0	0	0	0	0	0	0	0	0	0	0	0	0	0	0	0	0	0	0	0	0	0	0
Oleaceae	Nyctanthes	arbor-tristis			petal			1955/12/10-12/24	Roy, Subodh Kumar	The variation of organs of individual plants	1963	Journal of Genetics	Tree02	694	0	0	0	0	2	97	452	122	20	1	0	0	0	0	0	0	0	0	0	0	0	0	0	0	0	0	0	0	0	0	0	0	0	0	0
Oleaceae	Nyctanthes	arbor-tristis			petal			1955/12/10-12/24	Roy, Subodh Kumar	The variation of organs of individual plants	1963	Journal of Genetics	Tree03	469	0	0	0	0	3	36	305	110	15	0	0	0	0	0	0	0	0	0	0	0	0	0	0	0	0	0	0	0	0	0	0	0	0	0	0
Oleaceae	Nyctanthes	arbor-tristis			petal			1955/12/26-1956/01/11	Roy, Subodh Kumar	The variation of organs of individual plants	1963	Journal of Genetics	Tree01	459	0	0	0	0	1	71	317	65	5	0	0	0	0	0	0	0	0	0	0	0	0	0	0	0	0	0	0	0	0	0	0	0	0	0	0
Oleaceae	Nyctanthes	arbor-tristis			petal			1955/12/26-1956/01/11	Roy, Subodh Kumar	The variation of organs of individual plants	1963	Journal of Genetics	Tree02	392	0	0	0	0	3	41	242	96	9	1	0	0	0	0	0	0	0	0	0	0	0	0	0	0	0	0	0	0	0	0	0	0	0	0	0
Oleaceae	Nyctanthes	arbor-tristis			petal			1955/12/26-1956/01/11	Roy, Subodh Kumar	The variation of organs of individual plants	1963	Journal of Genetics	Tree03	459	0	0	0	0	2	45	286	122	4	0	0	0	0	0	0	0	0	0	0	0	0	0	0	0	0	0	0	0	0	0	0	0	0	0	0
Oleaceae	Nyctanthes	arbor-tristis			petal			1957	Roy, Subodh Kumar	The variation of organs of individual plants	1963	Journal of Genetics	Tree01	6046	0	0	0	0	13	1106	4481	425	21	0	0	0	0	0	0	0	0	0	0	0	0	0	0	0	0	0	0	0	0	0	0	0	0	0	0
Oleaceae	Nyctanthes	arbor-tristis			petal			1957	Roy, Subodh Kumar	The variation of organs of individual plants	1963	Journal of Genetics	Tree02	4785	0	0	0	0	4	387	3631	724	39	0	0	0	0	0	0	0	0	0	0	0	0	0	0	0	0	0	0	0	0	0	0	0	0	0	0
Oleaceae	Nyctanthes	arbor-tristis			petal			1957	Roy, Subodh Kumar	The variation of organs of individual plants	1963	Journal of Genetics	Tree03	5310	0	0	0	0	12	889	3474	897	37	1	0	0	0	0	0	0	0	0	0	0	0	0	0	0	0	0	0	0	0	0	0	0	0	0	0
Oleaceae	Nyctanthes	arbor-tristis			petal			1957	Roy, Subodh Kumar	The variation of organs of individual plants	1963	Journal of Genetics	Tree04	5175	0	0	0	0	0	345	3235	1462	128	4	0	0	0	0	0	1	0	0	0	0	0	0	0	0	0	0	0	0	0	0	0	0	0	0	0
Oleaceae	Nyctanthes	arbor-tristis			petal			1957	Roy, Subodh Kumar	The variation of organs of individual plants	1963	Journal of Genetics	Tree05	4928	0	0	0	0	40	1728	2804	340	16	0	0	0	0	0	0	0	0	0	0	0	0	0	0	0	0	0	0	0	0	0	0	0	0	0	0
Oleaceae	Nyctanthes	arbor-tristis			petal			1957	Roy, Subodh Kumar	The variation of organs of individual plants	1963	Journal of Genetics	Tree06	4949	0	0	0	0	19	1364	3225	328	13	0	0	0	0	0	0	0	0	0	0	0	0	0	0	0	0	0	0	0	0	0	0	0	0	0	0
Oleaceae	Nyctanthes	arbor-tristis			petal			1957	Roy, Subodh Kumar	The variation of organs of individual plants	1963	Journal of Genetics	Tree07	5162	0	0	0	0	2	602	3853	666	39	0	0	0	0	0	0	0	0	0	0	0	0	0	0	0	0	0	0	0	0	0	0	0	0	0	0
Oleaceae	Nyctanthes	arbor-tristis			petal			1957	Roy, Subodh Kumar	The variation of organs of individual plants	1963	Journal of Genetics	Tree08	4959	0	0	0	0	10	848	3117	920	64	0	0	0	0	0	0	0	0	0	0	0	0	0	0	0	0	0	0	0	0	0	0	0	0	0	0
Oleaceae	Nyctanthes	arbor-tristis			petal			1957	Roy, Subodh Kumar	The variation of organs of individual plants	1963	Journal of Genetics	Tree09	5229	0	0	0	0	29	1779	2909	502	10	0	0	0	0	0	0	0	0	0	0	0	0	0	0	0	0	0	0	0	0	0	0	0	0	0	0
Oleaceae	Nyctanthes	arbor-tristis			petal			1957	Roy, Subodh Kumar	The variation of organs of individual plants	1963	Journal of Genetics	Tree10	5100	0	0	0	0	75	2524	2361	137	3	0	0	0	0	0	0	0	0	0	0	0	0	0	0	0	0	0	0	0	0	0	0	0	0	0	0
Oleaceae	Nyctanthes	arbor-tristis			petal			1957	Roy, Subodh Kumar	The variation of organs of individual plants	1963	Journal of Genetics	Tree14	5271	0	0	0	0	5	1169	3604	482	11	0	0	0	0	0	0	0	0	0	0	0	0	0	0	0	0	0	0	0	0	0	0	0	0	0	0
Oleaceae	Nyctanthes	arbor-tristis			petal			1957	Roy, Subodh Kumar	The variation of organs of individual plants	1963	Journal of Genetics	Tree17	3601	0	0	0	0	5	754	2447	381	14	0	0	0	0	0	0	0	0	0	0	0	0	0	0	0	0	0	0	0	0	0	0	0	0	0	0
Oleaceae	Nyctanthes	arbor-tristis			petal			1957	Roy, Subodh Kumar	The variation of organs of individual plants	1963	Journal of Genetics	Tree18	3903	0	0	0	0	13	882	2780	227	1	0	0	0	0	0	0	0	0	0	0	0	0	0	0	0	0	0	0	0	0	0	0	0	0	0	0
Oleaceae	Nyctanthes	arbor-tristis			petal			1957	Roy, Subodh Kumar	The variation of organs of individual plants	1963	Journal of Genetics	Tree19	4105	0	0	0	0	5	463	3119	494	24	0	0	0	0	0	0	0	0	0	0	0	0	0	0	0	0	0	0	0	0	0	0	0	0	0	0
Oleaceae	Nyctanthes	arbor-tristis			petal			1957	Roy, Subodh Kumar	The variation of organs of individual plants	1963	Journal of Genetics	Tree20	4975	0	0	0	0	32	1428	3154	345	16	0	0	0	0	0	0	0	0	0	0	0	0	0	0	0	0	0	0	0	0	0	0	0	0	0	0
Oleaceae	Nyctanthes	arbor-tristis			petal			1957	Roy, Subodh Kumar	The variation of organs of individual plants	1963	Journal of Genetics	Tree21	4067	0	0	0	0	49	1324	2605	88	1	0	0	0	0	0	0	0	0	0	0	0	0	0	0	0	0	0	0	0	0	0	0	0	0	0	0
Oleaceae	Nyctanthes	arbor-tristis			petal			1957	Roy, Subodh Kumar	The variation of organs of individual plants	1963	Journal of Genetics	Tree23	4608	0	0	0	0	4	578	2814	1107	104	1	0	0	0	0	0	0	0	0	0	0	0	0	0	0	0	0	0	0	0	0	0	0	0	0	0
Papaveraceae	Sanguinaria	canadensis			ovule			1906	Harris, J. Arthur	A quantitative study of the morphology of the fruit of the bloodroot, Sanguinaria canadensis.	1910	Biometrika 7(3)	aborted ovule on first placenta	1000	91	173	181	161	140	93	43	39	20	21	12	6	6	7	3	0	0	1	0	0	0	1	2	0	0	0	0	0	0	0	0	0	0	0	0
Papaveraceae	Sanguinaria	canadensis			ovule			1906	Harris, J. Arthur	A quantitative study of the morphology of the fruit of the bloodroot, Sanguinaria canadensis.	1910	Biometrika 7(3)	aborted ovule on second placenta	1000	96	160	175	171	127	84	57	52	29	10	13	6	7	6	2	1	2	0	1	0	0	0	0	1	0	0	0	0	0	0	0	0	0	0	0
Papaveraceae	Sanguinaria	canadensis			ovule			1906	Harris, J. Arthur	A quantitative study of the morphology of the fruit of the bloodroot, Sanguinaria canadensis.	1910	Biometrika 7(3)	ovules on first placenta	1000	0	0	0	0	0	0	1	4	16	37	69	110	110	110	78	87	69	63	52	40	38	24	21	19	14	10	5	5	6	1	3	1	2	0	4
Papaveraceae	Sanguinaria	canadensis			ovule			1906	Harris, J. Arthur	A quantitative study of the morphology of the fruit of the bloodroot, Sanguinaria canadensis.	1910	Biometrika 7(3)	ovules on second placenta	1000	0	0	0	0	0	0	0	4	14	49	86	92	116	106	84	76	69	52	48	50	34	25	28	14	9	10	12	5	6	0	2	1	3	2	1
Papaveraceae	Sanguinaria	canadensis			ovule			1906	Harris, J. Arthur	A quantitative study of the morphology of the fruit of the bloodroot, Sanguinaria canadensis.	1910	Biometrika 7(3)	total number of aborted ovules per placenta	1000	27	52	92	97	100	107	87	98	64	60	36	34	34	16	18	15	13	9	7	11	3	3	1	2	2	1	3	3	1	0	0	1	0	0	0
Papaveraceae	Sanguinaria	canadensis			ovule			1906	Harris, J. Arthur	A quantitative study of the morphology of the fruit of the bloodroot, Sanguinaria canadensis.	1910	Biometrika 7(3)	total ovules per fruit	1000	0	0	0	0	0	0	0	0	0	0	0	0	0	0	0	3	8	14	15	29	35	48	58	54	58	55	54	53	40	42	40	42	35	32	32
Papaveraceae	Sanguinaria	canadensis			ovule			1907	Harris, J. Arthur	A quantitative study of the morphology of the fruit of the bloodroot, Sanguinaria canadensis.	1910	Biometrika 7(3)	aborted ovule on first placenta	400	37	87	75	61	51	29	22	13	9	9	1	2	0	0	0	3	1	0	0	0	0	0	0	0	0	0	0	0	0	0	0	0	0	0	0
Papaveraceae	Sanguinaria	canadensis			ovule			1907	Harris, J. Arthur	A quantitative study of the morphology of the fruit of the bloodroot, Sanguinaria canadensis.	1910	Biometrika 7(3)	aborted ovule on second placenta	400	40	88	92	55	38	33	16	11	8	5	6	1	2	3	1	1	0	0	0	0	0	0	0	0	0	0	0	0	0	0	0	0	0	0	0
Papaveraceae	Sanguinaria	canadensis			ovule			1907	Harris, J. Arthur	A quantitative study of the morphology of the fruit of the bloodroot, Sanguinaria canadensis.	1910	Biometrika 7(3)	ovules on first placenta	400	0	0	0	0	0	0	3	15	24	33	53	55	40	37	30	21	22	16	12	10	10	5	3	2	3	1	2	0	1	2	0	0	0	0	0
Papaveraceae	Sanguinaria	canadensis			ovule			1907	Harris, J. Arthur	A quantitative study of the morphology of the fruit of the bloodroot, Sanguinaria canadensis.	1910	Biometrika 7(3)	ovules on second placenta	400	0	0	0	0	0	3	4	11	23	34	41	60	46	36	34	29	21	13	10	5	8	8	2	3	2	1	2	2	0	2	0	0	0	0	0
Papaveraceae	Sanguinaria	canadensis			ovule			1907	Harris, J. Arthur	A quantitative study of the morphology of the fruit of the bloodroot, Sanguinaria canadensis.	1910	Biometrika 7(3)	total number of aborted ovules per placenta	400	9	26	51	48	51	47	33	25	19	20	12	15	5	4	5	5	8	7	1	2	0	2	0	1	0	1	0	1	0	1	1	0	0	0	0
Papaveraceae	Sanguinaria	canadensis			ovule			1907	Harris, J. Arthur	A quantitative study of the morphology of the fruit of the bloodroot, Sanguinaria canadensis.	1910	Biometrika 7(3)	total ovules per fruit	400	0	0	0	0	0	0	0	0	0	0	0	1	2	2	2	10	14	13	20	20	17	28	28	24	40	20	19	15	9	21	10	8	8	11	10
Papaveraceae	Sanguinaria	canadensis			petal			1926	Spencer, Warren P.	Variation in petal number in the bloodroot, Sanguinaria canadensis	1944	The American Naturalist		964	0	0	0	0	2	1	8	16	835	24	15	18	26	7	10	2	0	0	0	0	0	0	0	0	0	0	0	0	0	0	0	0	0	0	0
Papaveraceae	Sanguinaria	canadensis			petal	Little Apple Creek	US	1934	Spencer, Warren P.	Variation in petal number in the bloodroot, Sanguinaria canadensis	1944	The American Naturalist		1994	0	0	0	0	2	4	17	119	1492	137	115	59	40	7	2	0	0	0	0	0	0	0	0	0	0	0	0	0	0	0	0	0	0	0	0
Papaveraceae	Sanguinaria	canadensis			petal	Little Apple Creek	US	1938	Spencer, Warren P.	Variation in petal number in the bloodroot, Sanguinaria canadensis	1944	The American Naturalist		2470	0	0	0	0	0	1	18	55	2034	170	92	58	33	4	2	3	0	0	0	0	0	0	0	0	0	0	0	0	0	0	0	0	0	0	0
Papaveraceae	Sanguinaria	canadensis			petal	Little Apple Creek	US	1942	Spencer, Warren P.	Variation in petal number in the bloodroot, Sanguinaria canadensis	1944	The American Naturalist		5002	0	0	0	0	0	4	4	27	4227	306	202	130	89	12	1	0	0	0	0	0	0	0	0	0	0	0	0	0	0	0	0	0	0	0	0
Papaveraceae	Sanguinaria	canadensis			petal	Overton Road	US	1932	Spencer, Warren P.	Variation in petal number in the bloodroot, Sanguinaria canadensis	1944	The American Naturalist		2371	0	0	0	0	0	2	10	61	1816	269	105	64	40	1	1	2	0	0	0	0	0	0	0	0	0	0	0	0	0	0	0	0	0	0	0
Papaveraceae	Sanguinaria	canadensis			petal	Overton Road	US	1934	Spencer, Warren P.	Variation in petal number in the bloodroot, Sanguinaria canadensis	1944	The American Naturalist		5000	0	0	0	0	0	1	8	46	3473	648	378	237	172	27	8	2	0	0	0	0	0	0	0	0	0	0	0	0	0	0	0	0	0	0	0
Papaveraceae	Sanguinaria	canadensis			petal	Overton Road	US	1938	Spencer, Warren P.	Variation in petal number in the bloodroot, Sanguinaria canadensis	1944	The American Naturalist		5332	0	0	0	0	0	2	10	72	4537	394	185	80	40	5	5	1	0	0	0	0	0	1	0	0	0	0	0	0	0	0	0	0	0	0	0
Papaveraceae	Sanguinaria	canadensis			petal	Overton Road	US	1940	Spencer, Warren P.	Variation in petal number in the bloodroot, Sanguinaria canadensis	1944	The American Naturalist		5160	0	0	0	0	1	3	15	129	4337	371	149	84	62	7	2	0	0	0	0	0	0	0	0	0	0	0	0	0	0	0	0	0	0	0	0
Papaveraceae	Sanguinaria	canadensis			petal	Overton Road	US	1942	Spencer, Warren P.	Variation in petal number in the bloodroot, Sanguinaria canadensis	1944	The American Naturalist		2916	0	0	0	1	0	0	1	17	2511	215	90	43	36	1	1	0	0	0	0	0	0	0	0	0	0	0	0	0	0	0	0	0	0	0	0
Papaveraceae	Sanguinaria	canadensis			seeds			1906	Harris, J. Arthur	A quantitative study of the morphology of the fruit of the bloodroot, Sanguinaria canadensis.	1910	Biometrika 7(3)	seeds on first placenta	1000	0	2	3	4	10	13	33	53	78	110	126	116	111	76	59	55	38	31	27	18	12	9	6	4	3	0	1	1	1	0	0	0	0	0	0
Papaveraceae	Sanguinaria	canadensis			seeds			1906	Harris, J. Arthur	A quantitative study of the morphology of the fruit of the bloodroot, Sanguinaria canadensis.	1910	Biometrika 7(3)	seeds on second placenta	1000	1	2	3	5	6	18	43	62	72	126	120	105	85	86	66	50	33	31	28	24	11	3	9	1	7	1	1	1	0	0	0	0	0	0	0
Papaveraceae	Sanguinaria	canadensis			seeds			1906	Harris, J. Arthur	A quantitative study of the morphology of the fruit of the bloodroot, Sanguinaria canadensis.	1910	Biometrika 7(3)	total seeds developing per fruit	1000	0	1	0	1	1	2	1	1	5	3	9	6	12	22	21	47	38	58	49	64	63	70	56	68	38	53	39	34	30	27	25	24	19	14	15
Papaveraceae	Sanguinaria	canadensis			seeds			1907	Harris, J. Arthur	A quantitative study of the morphology of the fruit of the bloodroot, Sanguinaria canadensis.	1910	Biometrika 7(3)	seeds on first placenta	400	2	1	5	13	13	20	22	42	35	47	50	43	27	14	17	14	10	9	6	3	3	0	2	1	1	0	0	0	0	0	0	0	0	0	0
Papaveraceae	Sanguinaria	canadensis			seeds			1907	Harris, J. Arthur	A quantitative study of the morphology of the fruit of the bloodroot, Sanguinaria canadensis.	1910	Biometrika 7(3)	seeds on second placenta	400	2	4	2	10	10	18	28	36	48	41	44	34	42	26	15	12	6	3	7	5	2	0	0	1	1	2	1	0	0	0	0	0	0	0	0
Papaveraceae	Sanguinaria	canadensis			seeds			1907	Harris, J. Arthur	A quantitative study of the morphology of the fruit of the bloodroot, Sanguinaria canadensis.	1910	Biometrika 7(3)	total seeds developing per fruit	400	1	1	0	3	0	2	6	4	8	4	11	12	14	13	21	17	20	34	17	26	26	19	22	17	10	18	12	11	12	3	7	2	2	3	4
Polemoniaceae	Linanthus	androsaceus			petal			1964Apr-May	Huether, Carl A., Jr.	Constancy of the pentamerous corolla phenotype in natural populations of Linanthus	1968	Evolution	S1	600	0	0	0	0	15	579	4	2	0	0	0	0	0	0	0	0	0	0	0	0	0	0	0	0	0	0	0	0	0	0	0	0	0	0	0
Polemoniaceae	Linanthus	androsaceus			petal			1964Apr-May	Huether, Carl A., Jr.	Constancy of the pentamerous corolla phenotype in natural populations of Linanthus	1968	Evolution	S10	1000	0	0	0	0	16	965	12	4	1	1	1	0	0	0	0	0	0	0	0	0	0	0	0	0	0	0	0	0	0	0	0	0	0	0	0
Polemoniaceae	Linanthus	androsaceus			petal			1964Apr-May	Huether, Carl A., Jr.	Constancy of the pentamerous corolla phenotype in natural populations of Linanthus	1968	Evolution	S2	600	0	0	0	0	10	589	0	0	1	0	0	0	0	0	0	0	0	0	0	0	0	0	0	0	0	0	0	0	0	0	0	0	0	0	0
Polemoniaceae	Linanthus	androsaceus			petal			1964Apr-May	Huether, Carl A., Jr.	Constancy of the pentamerous corolla phenotype in natural populations of Linanthus	1968	Evolution	S3	600	0	0	0	0	9	579	10	1	1	0	0	0	0	0	0	0	0	0	0	0	0	0	0	0	0	0	0	0	0	0	0	0	0	0	0
Polemoniaceae	Linanthus	androsaceus			petal			1964Apr-May	Huether, Carl A., Jr.	Constancy of the pentamerous corolla phenotype in natural populations of Linanthus	1968	Evolution	S4	600	0	0	0	0	5	589	5	1	0	0	0	0	0	0	0	0	0	0	0	0	0	0	0	0	0	0	0	0	0	0	0	0	0	0	0
Polemoniaceae	Linanthus	androsaceus			petal			1964Apr-May	Huether, Carl A., Jr.	Constancy of the pentamerous corolla phenotype in natural populations of Linanthus	1968	Evolution	S5	600	0	0	0	0	6	584	9	1	0	0	0	0	0	0	0	0	0	0	0	0	0	0	0	0	0	0	0	0	0	0	0	0	0	0	0
Polemoniaceae	Linanthus	androsaceus			petal			1964Apr-May	Huether, Carl A., Jr.	Constancy of the pentamerous corolla phenotype in natural populations of Linanthus	1968	Evolution	S6	600	0	0	0	0	12	581	7	0	0	0	0	0	0	0	0	0	0	0	0	0	0	0	0	0	0	0	0	0	0	0	0	0	0	0	0
Polemoniaceae	Linanthus	androsaceus			petal			1964Apr-May	Huether, Carl A., Jr.	Constancy of the pentamerous corolla phenotype in natural populations of Linanthus	1968	Evolution	S7	600	0	0	0	0	7	590	3	0	0	0	0	0	0	0	0	0	0	0	0	0	0	0	0	0	0	0	0	0	0	0	0	0	0	0	0
Polemoniaceae	Linanthus	androsaceus			petal			1964Apr-May	Huether, Carl A., Jr.	Constancy of the pentamerous corolla phenotype in natural populations of Linanthus	1968	Evolution	S8	600	0	0	0	0	4	592	4	0	0	0	0	0	0	0	0	0	0	0	0	0	0	0	0	0	0	0	0	0	0	0	0	0	0	0	0
Polemoniaceae	Linanthus	androsaceus			petal			1964Apr-May	Huether, Carl A., Jr.	Constancy of the pentamerous corolla phenotype in natural populations of Linanthus	1968	Evolution	S9	600	0	0	0	1	8	583	8	0	0	0	0	0	0	0	0	0	0	0	0	0	0	0	0	0	0	0	0	0	0	0	0	0	0	0	0
Polemoniaceae	Linanthus	androsaceus			petal			1964Apr-May	Huether, Carl A., Jr.	Constancy of the pentamerous corolla phenotype in natural populations of Linanthus	1968	Evolution	T1	659	0	0	0	0	9	643	5	2	0	0	0	0	0	0	0	0	0	0	0	0	0	0	0	0	0	0	0	0	0	0	0	0	0	0	0
Polemoniaceae	Linanthus	androsaceus			petal			1964Apr-May	Huether, Carl A., Jr.	Constancy of the pentamerous corolla phenotype in natural populations of Linanthus	1968	Evolution	T12	658	0	0	0	0	10	647	1	0	0	0	0	0	0	0	0	0	0	0	0	0	0	0	0	0	0	0	0	0	0	0	0	0	0	0	0
Polemoniaceae	Linanthus	androsaceus			petal			1964Apr-May	Huether, Carl A., Jr.	Constancy of the pentamerous corolla phenotype in natural populations of Linanthus	1968	Evolution	T13	1700	0	0	0	0	21	1674	5	0	0	0	0	0	0	0	0	0	0	0	0	0	0	0	0	0	0	0	0	0	0	0	0	0	0	0	0
Polemoniaceae	Linanthus	androsaceus			petal			1964Apr-May	Huether, Carl A., Jr.	Constancy of the pentamerous corolla phenotype in natural populations of Linanthus	1968	Evolution	T14	1023	0	0	0	0	14	1006	3	0	0	0	0	0	0	0	0	0	0	0	0	0	0	0	0	0	0	0	0	0	0	0	0	0	0	0	0
Polemoniaceae	Linanthus	androsaceus			petal			1964Apr-May	Huether, Carl A., Jr.	Constancy of the pentamerous corolla phenotype in natural populations of Linanthus	1968	Evolution	T17	1000	0	0	0	0	21	970	8	1	0	0	0	0	0	0	0	0	0	0	0	0	0	0	0	0	0	0	0	0	0	0	0	0	0	0	0
Polemoniaceae	Linanthus	androsaceus			petal			1964Apr-May	Huether, Carl A., Jr.	Constancy of the pentamerous corolla phenotype in natural populations of Linanthus	1968	Evolution	T18	1025	0	0	0	0	13	1010	1	1	0	0	0	0	0	0	0	0	0	0	0	0	0	0	0	0	0	0	0	0	0	0	0	0	0	0	0
Polemoniaceae	Linanthus	androsaceus			petal			1964Apr-May	Huether, Carl A., Jr.	Constancy of the pentamerous corolla phenotype in natural populations of Linanthus	1968	Evolution	T19	1000	0	0	0	0	28	961	11	0	0	0	0	0	0	0	0	0	0	0	0	0	0	0	0	0	0	0	0	0	0	0	0	0	0	0	0
Polemoniaceae	Linanthus	androsaceus			petal			1964Apr-May	Huether, Carl A., Jr.	Constancy of the pentamerous corolla phenotype in natural populations of Linanthus	1968	Evolution	T2	483	0	0	0	0	17	466	0	0	0	0	0	0	0	0	0	0	0	0	0	0	0	0	0	0	0	0	0	0	0	0	0	0	0	0	0
Polemoniaceae	Linanthus	androsaceus			petal			1964Apr-May	Huether, Carl A., Jr.	Constancy of the pentamerous corolla phenotype in natural populations of Linanthus	1968	Evolution	T20	1000	0	0	0	0	32	962	6	0	0	0	0	0	0	0	0	0	0	0	0	0	0	0	0	0	0	0	0	0	0	0	0	0	0	0	0
Polemoniaceae	Linanthus	androsaceus			petal			1964Apr-May	Huether, Carl A., Jr.	Constancy of the pentamerous corolla phenotype in natural populations of Linanthus	1968	Evolution	T3	1000	0	0	0	0	21	976	2	1	0	0	0	0	0	0	0	0	0	0	0	0	0	0	0	0	0	0	0	0	0	0	0	0	0	0	0
Polemoniaceae	Linanthus	androsaceus			petal			1965	Huether, Carl A., Jr.	Constancy of the pentamerous corolla phenotype in natural populations of Linanthus	1968	Evolution	T1 late	1000	0	0	0	0	17	968	14	1	0	0	0	0	0	0	0	0	0	0	0	0	0	0	0	0	0	0	0	0	0	0	0	0	0	0	0
Polemoniaceae	Linanthus	androsaceus			petal			1965	Huether, Carl A., Jr.	Constancy of the pentamerous corolla phenotype in natural populations of Linanthus	1968	Evolution	T2 late	350	0	0	0	1	16	331	1	1	0	0	0	0	0	0	0	0	0	0	0	0	0	0	0	0	0	0	0	0	0	0	0	0	0	0	0
Polemoniaceae	Linanthus	androsaceus			petal			1965/05/06-11	Huether, Carl A., Jr.	Constancy of the pentamerous corolla phenotype in natural populations of Linanthus	1968	Evolution	S1	1000	0	0	0	0	57	914	25	4	0	0	0	0	0	0	0	0	0	0	0	0	0	0	0	0	0	0	0	0	0	0	0	0	0	0	0
Polemoniaceae	Linanthus	androsaceus			petal			1965/05/06-11	Huether, Carl A., Jr.	Constancy of the pentamerous corolla phenotype in natural populations of Linanthus	1968	Evolution	S2	1000	0	0	0	3	62	897	31	3	3	0	1	0	0	0	0	0	0	0	0	0	0	0	0	0	0	0	0	0	0	0	0	0	0	0	0
Polemoniaceae	Linanthus	androsaceus			petal			1965/05/06-11	Huether, Carl A., Jr.	Constancy of the pentamerous corolla phenotype in natural populations of Linanthus	1968	Evolution	S6	600	0	0	0	0	18	572	9	1	0	0	0	0	0	0	0	0	0	0	0	0	0	0	0	0	0	0	0	0	0	0	0	0	0	0	0
Polemoniaceae	Linanthus	androsaceus			petal			1965/05/06-11	Huether, Carl A., Jr.	Constancy of the pentamerous corolla phenotype in natural populations of Linanthus	1968	Evolution	T1	1500	0	0	0	0	15	1474	8	3	0	0	0	0	0	0	0	0	0	0	0	0	0	0	0	0	0	0	0	0	0	0	0	0	0	0	0
Polemoniaceae	Linanthus	androsaceus			petal			1965/05/06-11	Huether, Carl A., Jr.	Constancy of the pentamerous corolla phenotype in natural populations of Linanthus	1968	Evolution	T2	1000	0	0	0	0	19	973	8	0	0	0	0	0	0	0	0	0	0	0	0	0	0	0	0	0	0	0	0	0	0	0	0	0	0	0	0
Polemoniaceae	Linanthus	androsaceus			petal			1966	Huether, Carl A., Jr.	Constancy of the pentamerous corolla phenotype in natural populations of Linanthus	1968	Evolution	S1 early	1000	0	0	0	1	26	960	10	2	1	0	0	0	0	0	0	0	0	0	0	0	0	0	0	0	0	0	0	0	0	0	0	0	0	0	0
Polemoniaceae	Linanthus	androsaceus			petal			1966	Huether, Carl A., Jr.	Constancy of the pentamerous corolla phenotype in natural populations of Linanthus	1968	Evolution	S1 very late	1000	0	0	0	2	61	909	23	5	0	0	0	0	0	0	0	0	0	0	0	0	0	0	0	0	0	0	0	0	0	0	0	0	0	0	0
Polemoniaceae	Linanthus	androsaceus			petal			1966	Huether, Carl A., Jr.	Constancy of the pentamerous corolla phenotype in natural populations of Linanthus	1968	Evolution	S2 early	1000	0	0	0	0	29	965	5	0	1	0	0	0	0	0	0	0	0	0	0	0	0	0	0	0	0	0	0	0	0	0	0	0	0	0	0
Polemoniaceae	Linanthus	androsaceus			petal			1966	Huether, Carl A., Jr.	Constancy of the pentamerous corolla phenotype in natural populations of Linanthus	1968	Evolution	S2 very late	509	0	0	0	1	23	465	16	2	1	1	0	0	0	0	0	0	0	0	0	0	0	0	0	0	0	0	0	0	0	0	0	0	0	0	0
Polemoniaceae	Linanthus	androsaceus			petal			1966	Huether, Carl A., Jr.	Constancy of the pentamerous corolla phenotype in natural populations of Linanthus	1968	Evolution	S3 early	600	0	0	0	0	8	581	9	1	0	0	1	0	0	0	0	0	0	0	0	0	0	0	0	0	0	0	0	0	0	0	0	0	0	0	0
Polemoniaceae	Linanthus	androsaceus			petal			1966	Huether, Carl A., Jr.	Constancy of the pentamerous corolla phenotype in natural populations of Linanthus	1968	Evolution	S3 very late	509	0	0	0	1	24	456	23	3	0	1	1	0	0	0	0	0	0	0	0	0	0	0	0	0	0	0	0	0	0	0	0	0	0	0	0
Polemoniaceae	Linanthus	androsaceus			petal			1966	Huether, Carl A., Jr.	Constancy of the pentamerous corolla phenotype in natural populations of Linanthus	1968	Evolution	S6 very late	400	0	0	0	1	22	363	11	2	1	0	0	0	0	0	0	0	0	0	0	0	0	0	0	0	0	0	0	0	0	0	0	0	0	0	0
Polemoniaceae	Linanthus	androsaceus			petal			1966	Huether, Carl A., Jr.	Constancy of the pentamerous corolla phenotype in natural populations of Linanthus	1968	Evolution	S6.1 late	1020	0	0	0	0	22	971	23	2	1	0	1	0	0	0	0	0	0	0	0	0	0	0	0	0	0	0	0	0	0	0	0	0	0	0	0
Polemoniaceae	Linanthus	androsaceus			petal			1966	Huether, Carl A., Jr.	Constancy of the pentamerous corolla phenotype in natural populations of Linanthus	1968	Evolution	S6.1, S6.2 very late	212	0	0	0	0	11	192	9	0	0	0	0	0	0	0	0	0	0	0	0	0	0	0	0	0	0	0	0	0	0	0	0	0	0	0	0
Polemoniaceae	Linanthus	androsaceus			petal			1966	Huether, Carl A., Jr.	Constancy of the pentamerous corolla phenotype in natural populations of Linanthus	1968	Evolution	S6.2 late	600	0	0	0	1	21	570	8	0	0	0	0	0	0	0	0	0	0	0	0	0	0	0	0	0	0	0	0	0	0	0	0	0	0	0	0
Polemoniaceae	Linanthus	androsaceus			petal			1966	Huether, Carl A., Jr.	Constancy of the pentamerous corolla phenotype in natural populations of Linanthus	1968	Evolution	T1 early	800	0	0	0	0	15	771	13	1	0	0	0	0	0	0	0	0	0	0	0	0	0	0	0	0	0	0	0	0	0	0	0	0	0	0	0
Polemoniaceae	Linanthus	androsaceus			petal			1966	Huether, Carl A., Jr.	Constancy of the pentamerous corolla phenotype in natural populations of Linanthus	1968	Evolution	T1 late	1000	0	0	0	2	29	955	11	2	1	0	0	0	0	0	0	0	0	0	0	0	0	0	0	0	0	0	0	0	0	0	0	0	0	0	0
Polemoniaceae	Linanthus	androsaceus			petal			1966	Huether, Carl A., Jr.	Constancy of the pentamerous corolla phenotype in natural populations of Linanthus	1968	Evolution	T2 early	479	0	0	0	0	17	461	1	0	0	0	0	0	0	0	0	0	0	0	0	0	0	0	0	0	0	0	0	0	0	0	0	0	0	0	0
Polemoniaceae	Linanthus	androsaceus			petal			1966	Huether, Carl A., Jr.	Constancy of the pentamerous corolla phenotype in natural populations of Linanthus	1968	Evolution	T2 early	1000	0	0	0	0	34	957	9	0	0	0	0	0	0	0	0	0	0	0	0	0	0	0	0	0	0	0	0	0	0	0	0	0	0	0	0
Polemoniaceae	Linanthus	androsaceus			petal			1966	Huether, Carl A., Jr.	Constancy of the pentamerous corolla phenotype in natural populations of Linanthus	1968	Evolution	T2.1 early	650	0	0	0	0	14	633	2	1	0	0	0	0	0	0	0	0	0	0	0	0	0	0	0	0	0	0	0	0	0	0	0	0	0	0	0
Polemoniaceae	Linanthus	androsaceus			petal			1966	Huether, Carl A., Jr.	Constancy of the pentamerous corolla phenotype in natural populations of Linanthus	1968	Evolution	T2.1 late	366	0	0	0	0	7	358	1	0	0	0	0	0	0	0	0	0	0	0	0	0	0	0	0	0	0	0	0	0	0	0	0	0	0	0	0
Polemoniaceae	Linanthus	androsaceus			petal			1966	Huether, Carl A., Jr.	Constancy of the pentamerous corolla phenotype in natural populations of Linanthus	1968	Evolution	T2.2 late	402	0	0	0	0	10	387	5	0	0	0	0	0	0	0	0	0	0	0	0	0	0	0	0	0	0	0	0	0	0	0	0	0	0	0	0
Primulaceae	Trientalis	europaea			petal				Matthews, J. R.	Variation in Trientalis europaea Linn.	1941	J. Bot.		2370	0	0	0	0	0	6	438	1876	46	4	0	0	0	0	0	0	0	0	0	0	0	0	0	0	0	0	0	0	0	0	0	0	0	0	0
Primulaceae	Trientalis	europaea			petal	Konevets Island	Russia		Tikhodeev, ON	Variability of the Flower Structure in European Starflower (Trientalis europaea L.) in Natural Populations	2001	Russ. J. Ecol.		2618	0	0	0	0	0	13	774	1762	68	1	0	0	0	0	0	0	0	0	0	0	0	0	0	0	0	0	0	0	0	0	0	0	0	0	0
Primulaceae	Trientalis	europaea			petal	Vittsjö	Sweden	1912/6/8-23	Charlier, CVL	A statistical description of Trientalis europaea	1913	Arkiv foer Botanik		173	0	0	0	0	0	0	39	129	4	1	0	0	0	0	0	0	0	0	0	0	0	0	0	0	0	0	0	0	0	0	0	0	0	0	0
Primulaceae	Trientalis	europaea			sepal				Matthews, J. R.	Variation in Trientalis europaea Linn.	1941	J. Bot.		2370	0	0	0	0	0	6	438	1876	46	4	0	0	0	0	0	0	0	0	0	0	0	0	0	0	0	0	0	0	0	0	0	0	0	0	0
Primulaceae	Trientalis	europaea			sepal	Konevets Island	Russia		Tikhodeev, ON	Variability of the Flower Structure in European Starflower (Trientalis europaea L.) in Natural Populations	2001	Russ. J. Ecol.		2618	0	0	0	0	1	26	828	1711	51	1	0	0	0	0	0	0	0	0	0	0	0	0	0	0	0	0	0	0	0	0	0	0	0	0	0
Primulaceae	Trientalis	europaea			sepal	Vittsjö	Sweden	1912/6/8-23	Charlier, CVL	A statistical description of Trientalis europaea	1913	Arkiv foer Botanik		173	0	0	0	0	0	0	46	123	3	1	0	0	0	0	0	0	0	0	0	0	0	0	0	0	0	0	0	0	0	0	0	0	0	0	0
Primulaceae	Trientalis	europaea			stamen				Matthews, J. R.	Variation in Trientalis europaea Linn.	1941	J. Bot.		2370	0	0	0	0	0	6	438	1876	46	4	0	0	0	0	0	0	0	0	0	0	0	0	0	0	0	0	0	0	0	0	0	0	0	0	0
Primulaceae	Trientalis	europaea			stamen	Konevets Island	Russia		Tikhodeev, ON	Variability of the Flower Structure in European Starflower (Trientalis europaea L.) in Natural Populations	2001	Russ. J. Ecol.		2618	0	0	0	0	1	35	806	1698	78	0	0	0	0	0	0	0	0	0	0	0	0	0	0	0	0	0	0	0	0	0	0	0	0	0	0
Primulaceae	Trientalis	europaea			stamen	Vittsjö	Sweden	1912/6/8-23	Charlier, CVL	A statistical description of Trientalis europaea	1913	Arkiv foer Botanik		173	0	0	0	0	0	1	38	130	3	1	0	0	0	0	0	0	0	0	0	0	0	0	0	0	0	0	0	0	0	0	0	0	0	0	0
Ranunculaceae	Anemone	flaccida			tepal	Hanno City	Japan		Ohno, Masao	Field Watching 3: Walking throughout the spring field	1991	ISBN4-8326-0242-X		1624	0	0	0	1	9	1237	316	51	9	1	0	0	0	0	0	0	0	0	0	0	0	0	0	0	0	0	0	0	0	0	0	0	0	0	0
Ranunculaceae	Anemone	nemorosa			sepal			1898/04/20-23	Yule, GU	Variation of the number of sepals in Anemone nemorosa.	1902	Biometrika 1	A	1000	0	0	0	0	0	7	515	414	49	13	1	1	0	0	0	0	0	0	0	0	0	0	0	0	0	0	0	0	0	0	0	0	0	0	0
Ranunculaceae	Anemone	nemorosa			sepal			1898/04/21-22	Yule, GU	Variation of the number of sepals in Anemone nemorosa.	1902	Biometrika 1	C	1000	0	0	0	0	0	12	448	363	135	33	5	4	0	0	0	0	0	0	0	0	0	0	0	0	0	0	0	0	0	0	0	0	0	0	0
Ranunculaceae	Anemone	nemorosa			sepal			1898/04/21-23	Yule, GU	Variation of the number of sepals in Anemone nemorosa.	1902	Biometrika 1	B	1000	0	0	0	0	3	31	657	271	35	2	1	0	0	0	0	0	0	0	0	0	0	0	0	0	0	0	0	0	0	0	0	0	0	0	0
Ranunculaceae	Anemone	nemorosa			sepal			1898/05/07	Yule, GU	Variation of the number of sepals in Anemone nemorosa.	1902	Biometrika 1	C	1000	0	0	0	0	0	34	576	276	92	14	4	0	4	0	0	0	0	0	0	0	0	0	0	0	0	0	0	0	0	0	0	0	0	0	0
Ranunculaceae	Anemone	nemorosa			sepal			1899/04/08-12	Yule, GU	Variation of the number of sepals in Anemone nemorosa.	1902	Biometrika 1	C	1000	0	0	0	0	2	28	460	390	94	24	2	0	0	0	0	0	0	0	0	0	0	0	0	0	0	0	0	0	0	0	0	0	0	0	0
Ranunculaceae	Anemone	nemorosa			sepal			1899/04/09	Yule, GU	Variation of the number of sepals in Anemone nemorosa.	1902	Biometrika 1	A	1000	0	0	0	0	0	20	614	306	44	14	2	0	0	0	0	0	0	0	0	0	0	0	0	0	0	0	0	0	0	0	0	0	0	0	0
Ranunculaceae	Anemone	nemorosa			sepal			1900/04/15	Yule, GU	Variation of the number of sepals in Anemone nemorosa.	1902	Biometrika 1	C	1000	0	0	0	0	0	6	380	448	138	24	4	0	0	0	0	0	0	0	0	0	0	0	0	0	0	0	0	0	0	0	0	0	0	0	0
Ranunculaceae	Eranthis	hyemalis			nectary				Salisbury, Edward J.	Variation in Eranthis hyemalis, Ficaria verna, and other members of Ranunculaceae, with special reference to trimery and the origin of the perianth	1919	Ann. Bot.		300	0	0	0	0	0	3	248	33	15	1	0	0	0	0	0	0	0	0	0	0	0	0	0	0	0	0	0	0	0	0	0	0	0	0	0
Ranunculaceae	Eranthis	hyemalis			tepal				Salisbury, Edward J.	Variation in Eranthis hyemalis, Ficaria verna, and other members of Ranunculaceae, with special reference to trimery and the origin of the perianth	1919	Ann. Bot.		300	0	0	0	0	1	15	177	65	24	9	6	2	1	0	0	0	0	0	0	0	0	0	0	0	0	0	0	0	0	0	0	0	0	0	0
Ranunculaceae	Ranunculus	arvensis			petal	Kew	UK	1898	Burkill,	On the variation of the flower of Ranunculus arvensis	1902	Journal of the Asiatic Society of Bengal	KEW 1896 seeds	2298	2	2	26	237	430	1592	9	0	0	0	0	0	0	0	0	0	0	0	0	0	0	0	0	0	0	0	0	0	0	0	0	0	0	0	0
Ranunculaceae	Ranunculus	arvensis			petal	Kew	UK	1898	Burkill,	On the variation of the flower of Ranunculus arvensis	1902	Journal of the Asiatic Society of Bengal	KEW 1897 seeds	1589	3	2	19	182	289	1091	3	0	0	0	0	0	0	0	0	0	0	0	0	0	0	0	0	0	0	0	0	0	0	0	0	0	0	0	0
Ranunculaceae	Ranunculus	arvensis			petal	University Botanic Garden, Cambridge	UK	1895	Burkill,	On the variation of the flower of Ranunculus arvensis	1902	Journal of the Asiatic Society of Bengal	seeds from Bonn	1203	0	4	82	349	438	327	1	1	1	0	0	0	0	0	0	0	0	0	0	0	0	0	0	0	0	0	0	0	0	0	0	0	0	0	0
Ranunculaceae	Ranunculus	arvensis			petal	University Botanic Garden, Cambridge	UK	1895	Burkill,	On the variation of the flower of Ranunculus arvensis	1902	Journal of the Asiatic Society of Bengal	seeds from Stockholm	1383	0	5	126	486	417	345	3	1	0	0	0	0	0	0	0	0	0	0	0	0	0	0	0	0	0	0	0	0	0	0	0	0	0	0	0
Ranunculaceae	Ranunculus	arvensis			sepal	Kew	UK	1898	Burkill,	On the variation of the flower of Ranunculus arvensis	1902	Journal of the Asiatic Society of Bengal	KEW 1896 seeds	2298	0	0	2	13	63	2217	3	0	0	0	0	0	0	0	0	0	0	0	0	0	0	0	0	0	0	0	0	0	0	0	0	0	0	0	0
Ranunculaceae	Ranunculus	arvensis			sepal	Kew	UK	1898	Burkill,	On the variation of the flower of Ranunculus arvensis	1902	Journal of the Asiatic Society of Bengal	KEW 1897 seeds	1589	1	3	4	18	46	1516	1	0	0	0	0	0	0	0	0	0	0	0	0	0	0	0	0	0	0	0	0	0	0	0	0	0	0	0	0
Ranunculaceae	Ranunculus	arvensis			sepal	University Botanic Garden, Cambridge	UK	1895	Burkill,	On the variation of the flower of Ranunculus arvensis	1902	Journal of the Asiatic Society of Bengal	seeds from Bonn	1203	0	1	0	9	69	1121	2	0	1	0	0	0	0	0	0	0	0	0	0	0	0	0	0	0	0	0	0	0	0	0	0	0	0	0	0
Ranunculaceae	Ranunculus	arvensis			sepal	University Botanic Garden, Cambridge	UK	1895	Burkill,	On the variation of the flower of Ranunculus arvensis	1902	Journal of the Asiatic Society of Bengal	seeds from Stockholm	1383	0	0	0	1	85	1287	8	1	0	1	0	0	0	0	0	0	0	0	0	0	0	0	0	0	0	0	0	0	0	0	0	0	0	0	0
Ranunculaceae	Ranunculus	bulbosus			petal			1886	de Vries, Hugo	Ueber halbe Galton-Curve als Zeichen discontinuirlicher Variation	1894	Berichte der deutschen Botanischen Gesellschaft		337	0	0	0	0	0	312	17	4	2	2	0	0	0	0	0	0	0	0	0	0	0	0	0	0	0	0	0	0	0	0	0	0	0	0	0
Ranunculaceae	Ranunculus	bulbosus			petal			1887	de Vries, Hugo	Ueber halbe Galton-Curve als Zeichen discontinuirlicher Variation	1894	Berichte der deutschen Botanischen Gesellschaft		380	0	0	0	0	0	345	24	7	0	2	0	2	0	0	0	0	0	0	0	0	0	0	0	0	0	0	0	0	0	0	0	0	0	0	0
Ranunculaceae	Ranunculus	bulbosus			petal			1888	de Vries, Hugo	Ueber halbe Galton-Curve als Zeichen discontinuirlicher Variation	1894	Berichte der deutschen Botanischen Gesellschaft	cultivation	222	0	0	0	0	0	133	55	23	7	2	2	0	0	0	0	0	0	0	0	0	0	0	0	0	0	0	0	0	0	0	0	0	0	0	0
Ranunculaceae	Ranunculus	bulbosus			petal			1889	de Vries, Hugo	Ueber halbe Galton-Curve als Zeichen discontinuirlicher Variation	1894	Berichte der deutschen Botanischen Gesellschaft	after selection	128	0	0	0	0	0	45	24	28	17	8	4	0	1	1	0	0	0	0	0	0	0	0	0	0	0	0	0	0	0	0	0	0	0	0	0
Ranunculaceae	Ranunculus	bulbosus			petal			1890	de Vries, Hugo	Ueber halbe Galton-Curve als Zeichen discontinuirlicher Variation	1894	Berichte der deutschen Botanischen Gesellschaft	after selection	214	0	0	0	0	0	9	17	38	62	42	32	9	3	2	0	0	0	0	0	0	0	0	0	0	0	0	0	0	0	0	0	0	0	0	0
Ranunculaceae	Ranunculus	bulbosus			petal			1892?	de Vries, Hugo	Ueber halbe Galton-Curve als Zeichen discontinuirlicher Variation	1894	Berichte der deutschen Botanischen Gesellschaft		1130	0	0	0	0	0	40	52	126	165	204	215	177	104	35	8	4	0	0	0	0	0	0	0	0	0	0	0	0	0	0	0	0	0	0	0
Ranunculaceae	Ranunculus	ficaria			petal				Salisbury, Edward J.	Variation in Eranthis hyemalis, Ficaria verna, and other members of Ranunculaceae, with special reference to trimery and the origin of the perianth	1919	Ann. Bot.		514	0	0	0	0	2	9	61	107	265	45	18	7	0	0	0	0	0	0	0	0	0	0	0	0	0	0	0	0	0	0	0	0	0	0	0
Ranunculaceae	Ranunculus	ficaria			petal	Bordighera	Italy	Mar4-7	WR MACDONELL	Cooperative investigations on plants. II. Variation and correlation in lesser celandine from divers localities.	1903	Biometrika 2		570	0	0	0	0	0	0	1	9	542	6	11	1	0	0	0	0	0	0	0	0	0	0	0	0	0	0	0	0	0	0	0	0	0	0	0
Ranunculaceae	Ranunculus	ficaria			petal	Cambridge	UK	1833, 1834	Babington, Charles C.	On the supposed generic Distinction of Ranunculus Ficaria of Linne.	1834	Magazine of Natural History and Journal of Zoology, Botany, Mineralogy, Geology and Meteorology		2390	0	0	0	0	1	10	75	423	1526	261	60	28	4	1	1	0	0	0	0	0	0	0	0	0	0	0	0	0	0	0	0	0	0	0	0
Ranunculaceae	Ranunculus	ficaria			petal	Dorset	UK	Apr07	WR MACDONELL	Cooperative investigations on plants. II. Variation and correlation in lesser celandine from divers localities.	1903	Biometrika 2		505	0	0	0	0	0	0	0	4	283	117	63	32	4	2	0	0	0	0	0	0	0	0	0	0	0	0	0	0	0	0	0	0	0	0	0
Ranunculaceae	Ranunculus	ficaria			petal	Gais	Switzerland	1900	Ludwig, F	Variationsstatistische probleme und materialien	1901	Biometrika		184	0	0	0	0	0	0	1	14	89	51	21	6	2	0	0	0	0	0	0	0	0	0	0	0	0	0	0	0	0	0	0	0	0	0	0
Ranunculaceae	Ranunculus	ficaria			petal	Gais	Switzerland	1901	Ludwig, F	Variationsstatistische probleme und materialien	1901	Biometrika		1000	0	0	0	0	0	0	2	34	139	265	296	175	69	18	2	0	0	0	0	0	0	0	0	0	0	0	0	0	0	0	0	0	0	0	0
Ranunculaceae	Ranunculus	ficaria			petal	Gera	Germany		Ludwig, F	Variationsstatistische probleme und materialien	1901	Biometrika		712	0	0	0	0	0	0	0	9	549	112	42	0	0	0	0	0	0	0	0	0	0	0	0	0	0	0	0	0	0	0	0	0	0	0	0
Ranunculaceae	Ranunculus	ficaria			petal	Gera	Germany		Ludwig, F	Variationsstatistische probleme und materialien	1901	Biometrika		675	0	0	0	0	0	9	23	99	410	68	55	11	0	0	0	0	0	0	0	0	0	0	0	0	0	0	0	0	0	0	0	0	0	0	0
Ranunculaceae	Ranunculus	ficaria			petal	Gera	Germany		Ludwig, F	Variationsstatistische probleme und materialien	1901	Biometrika		1000	0	0	0	0	0	16	31	112	563	175	62	24	11	5	0	1	0	0	0	0	0	0	0	0	0	0	0	0	0	0	0	0	0	0	0
Ranunculaceae	Ranunculus	ficaria			petal	Greiz	Germany		Ludwig, F	Variationsstatistische probleme und materialien	1901	Biometrika		1000	0	0	0	0	0	3	37	162	428	198	107	36	21	7	0	1	0	0	0	0	0	0	0	0	0	0	0	0	0	0	0	0	0	0	0
Ranunculaceae	Ranunculus	ficaria			petal	Greiz	Germany		Ludwig, F	Variationsstatistische probleme und materialien	1901	Biometrika		1000	0	0	0	0	0	6	22	98	636	146	53	25	5	9	0	0	0	0	0	0	0	0	0	0	0	0	0	0	0	0	0	0	0	0	0
Ranunculaceae	Ranunculus	ficaria			petal	Greiz	Germany		Ludwig, F	Variationsstatistische probleme und materialien	1901	Biometrika		1000	0	0	0	0	1	12	48	180	427	171	92	37	26	4	2	0	0	0	0	0	0	0	0	0	0	0	0	0	0	0	0	0	0	0	0
Ranunculaceae	Ranunculus	ficaria			petal	Greiz	Germany	1900	Ludwig, F	Variationsstatistische probleme und materialien	1901	Biometrika		300	0	0	0	0	1	0	14	37	121	52	50	9	13	2	0	1	0	0	0	0	0	0	0	0	0	0	0	0	0	0	0	0	0	0	0
Ranunculaceae	Ranunculus	ficaria			petal	Greiz	Germany	1901	Ludwig, F	Variationsstatistische probleme und materialien	1901	Biometrika		300	0	0	0	0	1	3	4	55	111	59	44	23	0	0	0	0	0	0	0	0	0	0	0	0	0	0	0	0	0	0	0	0	0	0	0
Ranunculaceae	Ranunculus	ficaria			petal	Greiz	Germany	1901	Ludwig, F	Variationsstatistische probleme und materialien	1901	Biometrika		400	0	0	0	1	0	3	6	60	169	94	50	11	4	2	0	0	0	0	0	0	0	0	0	0	0	0	0	0	0	0	0	0	0	0	0
Ranunculaceae	Ranunculus	ficaria			petal	Shrewsbury		1832	Babington, Charles C.	On the supposed generic Distinction of Ranunculus Ficaria of Linne.	1834	Magazine of Natural History and Journal of Zoology, Botany, Mineralogy, Geology and Meteorology		292	0	0	0	0	0	0	0	9	153	44	51	22	11	2	0	0	0	0	0	0	0	0	0	0	0	0	0	0	0	0	0	0	0	0	0
Ranunculaceae	Ranunculus	ficaria			petal	St Peter Port	Crown dependencies	Apr25-30	WR MACDONELL	Cooperative investigations on plants. II. Variation and correlation in lesser celandine from divers localities.	1903	Biometrika 2		520	0	0	0	0	0	0	0	7	452	50	7	4	0	0	0	0	0	0	0	0	0	0	0	0	0	0	0	0	0	0	0	0	0	0	0
Ranunculaceae	Ranunculus	ficaria			petal	Surrey	UK	Apr12-17	WR MACDONELL	Cooperative investigations on plants. II. Variation and correlation in lesser celandine from divers localities.	1903	Biometrika 2		500	0	0	0	0	0	0	2	20	429	42	5	2	0	0	0	0	0	0	0	0	0	0	0	0	0	0	0	0	0	0	0	0	0	0	0
Ranunculaceae	Ranunculus	ficaria			petal	Trogen	Switzerland	1900	Ludwig, F	Variationsstatistische probleme und materialien	1901	Biometrika		285	0	0	0	0	0	1	4	34	183	43	17	3	0	0	0	0	0	0	0	0	0	0	0	0	0	0	0	0	0	0	0	0	0	0	0
Ranunculaceae	Ranunculus	ficaria			sepal	Bordighera	Italy	Mar4-7	WR MACDONELL	Cooperative investigations on plants. II. Variation and correlation in lesser celandine from divers localities.	1903	Biometrika 2		624	0	0	2	582	39	1	0	0	0	0	0	0	0	0	0	0	0	0	0	0	0	0	0	0	0	0	0	0	0	0	0	0	0	0	0
Ranunculaceae	Ranunculus	ficaria			sepal	Cambridge	UK	1833, 1834	Babington, Charles C.	On the supposed generic Distinction of Ranunculus Ficaria of Linne.	1834	Magazine of Natural History and Journal of Zoology, Botany, Mineralogy, Geology and Meteorology		2390	0	0	3	2265	102	20	0	0	0	0	0	0	0	0	0	0	0	0	0	0	0	0	0	0	0	0	0	0	0	0	0	0	0	0	0
Ranunculaceae	Ranunculus	ficaria			sepal	Dorset	UK	Apr07	WR MACDONELL	Cooperative investigations on plants. II. Variation and correlation in lesser celandine from divers localities.	1903	Biometrika 2		505	0	0	0	491	13	1	0	0	0	0	0	0	0	0	0	0	0	0	0	0	0	0	0	0	0	0	0	0	0	0	0	0	0	0	0
Ranunculaceae	Ranunculus	ficaria			sepal	Gais	Switzerland	1900	Ludwig, F	Variationsstatistische probleme und materialien	1901	Biometrika		184	0	0	0	9	45	126	4	0	0	0	0	0	0	0	0	0	0	0	0	0	0	0	0	0	0	0	0	0	0	0	0	0	0	0	0
Ranunculaceae	Ranunculus	ficaria			sepal	Gais	Switzerland	1901	Ludwig, F	Variationsstatistische probleme und materialien	1901	Biometrika		1000	0	0	2	91	283	616	7	1	0	0	0	0	0	0	0	0	0	0	0	0	0	0	0	0	0	0	0	0	0	0	0	0	0	0	0
Ranunculaceae	Ranunculus	ficaria			sepal	Gera	Germany		Ludwig, F	Variationsstatistische probleme und materialien	1901	Biometrika		675	0	0	1	526	101	43	4	0	0	0	0	0	0	0	0	0	0	0	0	0	0	0	0	0	0	0	0	0	0	0	0	0	0	0	0
Ranunculaceae	Ranunculus	ficaria			sepal	Gera	Germany		Ludwig, F	Variationsstatistische probleme und materialien	1901	Biometrika		712	0	0	4	611	28	69	0	0	0	0	0	0	0	0	0	0	0	0	0	0	0	0	0	0	0	0	0	0	0	0	0	0	0	0	0
Ranunculaceae	Ranunculus	ficaria			sepal	Gera	Germany		Ludwig, F	Variationsstatistische probleme und materialien	1901	Biometrika		1000	3	0	21	733	152	86	5	0	0	0	0	0	0	0	0	0	0	0	0	0	0	0	0	0	0	0	0	0	0	0	0	0	0	0	0
Ranunculaceae	Ranunculus	ficaria			sepal	Greiz	Germany		Ludwig, F	Variationsstatistische probleme und materialien	1901	Biometrika		1000	0	0	0	718	137	136	8	1	0	0	0	0	0	0	0	0	0	0	0	0	0	0	0	0	0	0	0	0	0	0	0	0	0	0	0
Ranunculaceae	Ranunculus	ficaria			sepal	Greiz	Germany		Ludwig, F	Variationsstatistische probleme und materialien	1901	Biometrika		1000	6	4	11	473	312	188	6	0	0	0	0	0	0	0	0	0	0	0	0	0	0	0	0	0	0	0	0	0	0	0	0	0	0	0	0
Ranunculaceae	Ranunculus	ficaria			sepal	Greiz	Germany		Ludwig, F	Variationsstatistische probleme und materialien	1901	Biometrika		1000	9	2	4	482	284	211	8	0	0	0	0	0	0	0	0	0	0	0	0	0	0	0	0	0	0	0	0	0	0	0	0	0	0	0	0
Ranunculaceae	Ranunculus	ficaria			sepal	Greiz	Germany	1900	Ludwig, F	Variationsstatistische probleme und materialien	1901	Biometrika		300	0	0	11	168	74	37	10	0	0	0	0	0	0	0	0	0	0	0	0	0	0	0	0	0	0	0	0	0	0	0	0	0	0	0	0
Ranunculaceae	Ranunculus	ficaria			sepal	Greiz	Germany	1901	Ludwig, F	Variationsstatistische probleme und materialien	1901	Biometrika		300	0	0	3	143	93	49	10	2	0	0	0	0	0	0	0	0	0	0	0	0	0	0	0	0	0	0	0	0	0	0	0	0	0	0	0
Ranunculaceae	Ranunculus	ficaria			sepal	Greiz	Germany	1901	Ludwig, F	Variationsstatistische probleme und materialien	1901	Biometrika		400	2	1	7	203	107	76	4	0	0	0	0	0	0	0	0	0	0	0	0	0	0	0	0	0	0	0	0	0	0	0	0	0	0	0	0
Ranunculaceae	Ranunculus	ficaria			sepal	Shrewsbury		1832	Babington, Charles C.	On the supposed generic Distinction of Ranunculus Ficaria of Linne.	1834	Magazine of Natural History and Journal of Zoology, Botany, Mineralogy, Geology and Meteorology		292	0	0	0	162	112	18	0	0	0	0	0	0	0	0	0	0	0	0	0	0	0	0	0	0	0	0	0	0	0	0	0	0	0	0	0
Ranunculaceae	Ranunculus	ficaria			sepal	St Peter Port	Crown dependencies	Apr25-30	WR MACDONELL	Cooperative investigations on plants. II. Variation and correlation in lesser celandine from divers localities.	1903	Biometrika 2		520	0	0	0	515	5	0	0	0	0	0	0	0	0	0	0	0	0	0	0	0	0	0	0	0	0	0	0	0	0	0	0	0	0	0	0
Ranunculaceae	Ranunculus	ficaria			sepal	Surrey	UK	Apr12-17	WR MACDONELL	Cooperative investigations on plants. II. Variation and correlation in lesser celandine from divers localities.	1903	Biometrika 2		500	0	0	0	495	5	0	0	0	0	0	0	0	0	0	0	0	0	0	0	0	0	0	0	0	0	0	0	0	0	0	0	0	0	0	0
Ranunculaceae	Ranunculus	ficaria			sepal	Trogen	Switzerland	1900	Ludwig, F	Variationsstatistische probleme und materialien	1901	Biometrika		285	0	0	0	194	74	15	2	0	0	0	0	0	0	0	0	0	0	0	0	0	0	0	0	0	0	0	0	0	0	0	0	0	0	0	0
Ranunculaceae	Ranunculus	parviflorus			petal	Kew	UK	1931?	Salisbury, Edward J.	On the Morphology and Ecology of Ranunculus parviflorus, L.	1931	Ann. Bot.		725	6	63	344	290	19	3	0	0	0	0	0	0	0	0	0	0	0	0	0	0	0	0	0	0	0	0	0	0	0	0	0	0	0	0	0
Ranunculaceae	Ranunculus	repens			petal				Salisbury, Edward J.	The organization of the ranunculaceous flower with especial regard to the correlated variations of its constituent members	1973	Proc. R. Soc. Lond. B.		1000	0	0	0	0	6	591	222	107	35	23	10	2	2	1	1	0	0	0	0	0	0	0	0	0	0	0	0	0	0	0	0	0	0	0	0
Ranunculaceae	Ranunculus	repens			petal				Salisbury, Edward J.	The organization of the ranunculaceous flower with especial regard to the correlated variations of its constituent members	1973	Proc. R. Soc. Lond. B.	after de Vries	222	0	0	0	0	0	59	24	10	3	1	1	0	0	0	0	0	0	0	0	0	0	0	0	0	0	0	0	0	0	0	0	0	0	0	0
Ranunculaceae	Ranunculus	repens			petal			1896	Pledge, John H.	Second contribution on numerical variation of parts in Ranunculus repens (L.)	1898	Natural Science		500	0	0	0	0	7	345	60	36	24	13	6	7	1	1	0	0	0	0	0	0	0	0	0	0	0	0	0	0	0	0	0	0	0	0	0
Ranunculaceae	Ranunculus	repens			petal			1897	Pledge, John H.	Second contribution on numerical variation of parts in Ranunculus repens (L.)	1898	Natural Science		500	0	0	0	0	1	361	85	36	14	2	1	0	0	0	0	0	0	0	0	0	0	0	0	0	0	0	0	0	0	0	0	0	0	0	0
Ranunculaceae	Ranunculus	repens			sepal			1897	Pledge, John H.	Second contribution on numerical variation of parts in Ranunculus repens (L.)	1898	Natural Science		500	0	0	0	1	11	478	9	1	0	0	0	0	0	0	0	0	0	0	0	0	0	0	0	0	0	0	0	0	0	0	0	0	0	0	0
Ranunculaceae	Trollius	europaeus			nectary				Schoeffel, Karl	Untersuchungen Über Den Blütenbau Der Ranunculaceen	1932	Planta		70	0	0	0	0	1	2	5	5	14	15	13	7	2	3	1	0	0	1	0	1	0	0	0	0	0	0	0	0	0	0	0	0	0	0	0
Ranunculaceae	Trollius	europaeus			tepal				Schoeffel, Karl	Untersuchungen Über Den Blütenbau Der Ranunculaceen	1932	Planta		70	0	0	0	0	0	0	0	0	3	7	12	22	10	9	2	2	0	1	1	0	0	1	0	0	0	0	0	0	0	0	0	0	0	0	0
[truncated: 54 more columns]

## Sheet: Original data
Family	Genus	Species	Subspecies	Variety	Organ	Field	Country	Date	n	0	1	2	3	4	5	6	7	8	9	10	11	12	13	14	15	16	17	18	19	20	21	22	23	24	25	26	27	28	29	30	31	32	33	34	35	36	37	38	39
Asteraceae	Aster	ageratoides			ray	Chino City	Japan	2010/09/25	102	0	0	0	0	0	0	0	0	1	8	10	22	24	30	6	1	0	0	0	0	0	0	0	0	0	0	0	0	0	0	0	0	0	0	0	0	0	0	0	0
Asteraceae	Farfugium	sp.			ray	Toyonaka City	Japan	2011/11/	108	0	0	0	0	0	0	0	0	1	5	1	3	13	79	5	0	1	0	0	0	0	0	0	0	0	0	0	0	0	0	0	0	0	0	0	0	0	0	0	0
Asteraceae	Helianthus	tuberosus			ray	Sendai City	Japan	2010/09/21	169	0	0	0	0	0	0	0	0	5	38	50	37	28	11	0	0	0	0	0	0	0	0	0	0	0	0	0	0	0	0	0	0	0	0	0	0	0	0	0	0
Asteraceae	Helianthus	tuberosus			ray	Sendai City	Japan	2010/09/21	58	0	0	0	0	0	0	0	0	4	14	10	17	11	2	0	0	0	0	0	0	0	0	0	0	0	0	0	0	0	0	0	0	0	0	0	0	0	0	0	0
Asteraceae	Helianthus	tuberosus			ray	Chino City	Japan	2011/8/21	93	0	0	0	0	0	0	0	0	5	4	3	5	5	31	10	11	8	5	3	1	0	1	0	1	0	0	0	0	0	0	0	0	0	0	0	0	0	0	0	0
Asteraceae	Lapsana	apogonoides			ray	Minoo City	Japan	2010/04/21	118	0	0	0	1	0	6	27	49	29	6	0	0	0	0	0	0	0	0	0	0	0	0	0	0	0	0	0	0	0	0	0	0	0	0	0	0	0	0	0	0
Asteraceae	Rudbeckia	laciniata			ray	Mt. Norikura	Japan	2011/08/02-04	433	0	0	0	0	0	0	0	0	29	27	14	15	37	227	57	12	10	4	1	0	0	0	0	0	0	0	0	0	0	0	0	0	0	0	0	0	0	0	0	0
Asteraceae	Rudbeckia	laciniata			ray	Chino City	Japan	2011/8/22	199	0	0	0	0	0	0	0	9	99	63	20	4	2	2	0	0	0	0	0	0	0	0	0	0	0	0	0	0	0	0	0	0	0	0	0	0	0	0	0	0
Asteraceae	Rudbeckia	laciniata			ray	Chino City	Japan	2011/8/22	102	0	0	0	0	0	0	0	3	31	28	23	13	2	1	0	1	0	0	0	0	0	0	0	0	0	0	0	0	0	0	0	0	0	0	0	0	0	0	0	0
Boraginaceae	Myosotis	sp.			petal	Toyonaka City	Japan	2012	644	0	0	0	0	3	395	155	20	14	22	25	8	2	0	0	0	0	0	0	0	0	0	0	0	0	0	0	0	0	0	0	0	0	0	0	0	0	0	0	0
Caryophyllaceae	Stellaria	media			stamen	Koka City	Japan	2011/03/17	46	0	1	4	10	15	14	2	0	0	0	0	0	0	0	0	0	0	0	0	0	0	0	0	0	0	0	0	0	0	0	0	0	0	0	0	0	0	0	0	0
Primulaceae	Primula	×julianna			petal	Toyonaka City	Japan	2012/1/22-3/13	603	0	0	0	0	5	213	355	24	1	1	0	1	2	1	0	0	0	0	0	0	0	0	0	0	0	0	0	0	0	0	0	0	0	0	0	0	0	0	0	0
Primulaceae	Primula	×julianna			petal	Toyonaka City	Japan	2012/1/22-3/13	475	0	0	0	0	2	56	328	63	25	1	0	0	0	0	0	0	0	0	0	0	0	0	0	0	0	0	0	0	0	0	0	0	0	0	0	0	0	0	0	0
Primulaceae	Primula	×julianna			sepal	Toyonaka City	Japan	2012/1/22-3/13	603	0	0	0	1	4	225	352	17	0	0	0	3	1	0	0	0	0	0	0	0	0	0	0	0	0	0	0	0	0	0	0	0	0	0	0	0	0	0	0	0
Primulaceae	Primula	×julianna			stamen	Toyonaka City	Japan	2012/1/22-3/13	603	0	0	0	0	6	241	327	20	5	0	0	1	2	1	0	0	0	0	0	0	0	0	0	0	0	0	0	0	0	0	0	0	0	0	0	0	0	0	0	0
Ranunculaceae	Anemone	flaccida			tepal	Mt. Ibuki	Japan	2011/05/25	2519	0	0	0	0	5	2318	174	16	5	1	0	0	0	0	0	0	0	0	0	0	0	0	0	0	0	0	0	0	0	0	0	0	0	0	0	0	0	0	0	0
Ranunculaceae	Anemone	flaccida			tepal	Mt. Ibuki	Japan	2011/05/25	2445	0	0	0	0	21	2323	90	7	4	0	0	0	0	0	0	0	0	0	0	0	0	0	0	0	0	0	0	0	0	0	0	0	0	0	0	0	0	0	0	0
Ranunculaceae	Anemone	flaccida			tepal	Mt. Ibuki	Japan	2011/05/25	1033	0	0	0	0	1	947	71	13	1	0	0	0	0	0	0	0	0	0	0	0	0	0	0	0	0	0	0	0	0	0	0	0	0	0	0	0	0	0	0	0
Ranunculaceae	Anemone	flaccida			tepal	Mt. Kongo	Japan	2011/05/07	1717	0	0	0	0	9	1306	361	39	2	0	0	0	0	0	0	0	0	0	0	0	0	0	0	0	0	0	0	0	0	0	0	0	0	0	0	0	0	0	0	0
Ranunculaceae	Anemone	flaccida			tepal	Mt. Kongo	Japan	2011/05/16	671	0	0	0	0	7	439	198	24	2	1	0	0	0	0	0	0	0	0	0	0	0	0	0	0	0	0	0	0	0	0	0	0	0	0	0	0	0	0	0	0
Ranunculaceae	Anemone	flaccida			tepal	Mt. Kongo	Japan	2011/05/16	1528	0	0	0	0	5	1343	159	20	1	0	0	0	0	0	0	0	0	0	0	0	0	0	0	0	0	0	0	0	0	0	0	0	0	0	0	0	0	0	0	0
Ranunculaceae	Anemone	flaccida			tepal	Mt. Kongo	Japan	2011/05/16	1384	0	0	0	0	4	1189	166	22	2	1	0	0	0	0	0	0	0	0	0	0	0	0	0	0	0	0	0	0	0	0	0	0	0	0	0	0	0	0	0	0
Ranunculaceae	Anemone	flaccida			tepal	Mt. Kongo	Japan	2011/05/16	5702	0	0	0	0	18	4985	625	67	6	1	0	0	0	0	0	0	0	0	0	0	0	0	0	0	0	0	0	0	0	0	0	0	0	0	0	0	0	0	0	0
Ranunculaceae	Anemone	flaccida			tepal	Sasayama City	Japan	2011/04/13	355	0	0	0	0	2	312	35	4	2	0	0	0	0	0	0	0	0	0	0	0	0	0	0	0	0	0	0	0	0	0	0	0	0	0	0	0	0	0	0	0
Ranunculaceae	Anemone	flaccida			tepal	Nose Town	Japan	2011/04/27	4519	0	0	0	0	62	4414	43	0	0	0	0	0	0	0	0	0	0	0	0	0	0	0	0	0	0	0	0	0	0	0	0	0	0	0	0	0	0	0	0	0
Ranunculaceae	Anemone	hupehensis		japonica	tepal	Kyoto City	Japan	2010/09/25	174	0	0	0	0	1	85	46	26	14	2	0	0	0	0	0	0	0	0	0	0	0	0	0	0	0	0	0	0	0	0	0	0	0	0	0	0	0	0	0	0
Ranunculaceae	Anemone	hupehensis		japonica	tepal	Kyoto City	Japan	2010/10/02	247	0	0	0	0	0	120	76	34	9	6	1	1	0	0	0	0	0	0	0	0	0	0	0	0	0	0	0	0	0	0	0	0	0	0	0	0	0	0	0	0
Ranunculaceae	Anemone	hupehensis		japonica	tepal	Kyoto City	Japan	2010/10/02	77	0	0	0	0	0	4	16	37	17	3	0	0	0	0	0	0	0	0	0	0	0	0	0	0	0	0	0	0	0	0	0	0	0	0	0	0	0	0	0	0
Ranunculaceae	Anemone	narcissiflora		nipponica	tepal	Mt. Norikura	Japan	2011/8/2-4	266	0	0	0	0	0	114	86	40	20	5	1	0	0	0	0	0	0	0	0	0	0	0	0	0	0	0	0	0	0	0	0	0	0	0	0	0	0	0	0	0
Ranunculaceae	Anemone	narcissiflora		nipponica	tepal	Mt. Norikura	Japan	2011/8/2-4	245	0	0	0	0	2	93	94	35	11	8	2	0	0	0	0	0	0	0	0	0	0	0	0	0	0	0	0	0	0	0	0	0	0	0	0	0	0	0	0	0
Ranunculaceae	Anemone	nikoensis			tepal	Sasayama City	Japan	2014/04/22	120	0	0	0	0	0	14	55	49	2	0	0	0	0	0	0	0	0	0	0	0	0	0	0	0	0	0	0	0	0	0	0	0	0	0	0	0	0	0	0	0
Ranunculaceae	Anemone	nikoensis			tepal	Sasayama City	Japan	2014/04/22	124	0	0	0	0	1	93	23	6	1	0	0	0	0	0	0	0	0	0	0	0	0	0	0	0	0	0	0	0	0	0	0	0	0	0	0	0	0	0	0	0
Ranunculaceae	Anemone	nikoensis			tepal	Sasayama City	Japan	2014/04/25	88	0	0	0	0	0	87	1	0	0	0	0	0	0	0	0	0	0	0	0	0	0	0	0	0	0	0	0	0	0	0	0	0	0	0	0	0	0	0	0	0
Ranunculaceae	Anemone	nikoensis			tepal	Sasayama City	Japan	2014/04/25	161	0	0	0	0	0	17	69	73	2	0	0	0	0	0	0	0	0	0	0	0	0	0	0	0	0	0	0	0	0	0	0	0	0	0	0	0	0	0	0	0
Ranunculaceae	Anemone	nikoensis			tepal	Sasayama City	Japan	2014/04/25	101	0	0	0	0	0	93	8	0	0	0	0	0	0	0	0	0	0	0	0	0	0	0	0	0	0	0	0	0	0	0	0	0	0	0	0	0	0	0	0	0
Ranunculaceae	Anemone	nikoensis			tepal	Sasayama City	Japan	2014/04/25	165	0	0	0	0	1	123	32	8	1	0	0	0	0	0	0	0	0	0	0	0	0	0	0	0	0	0	0	0	0	0	0	0	0	0	0	0	0	0	0	0
Ranunculaceae	Anemone	raddeana			tepal	Mimasaka City	Japan	2011/04/01	267	0	0	0	0	0	0	0	0	0	0	7	16	167	23	48	3	3	0	0	0	0	0	0	0	0	0	0	0	0	0	0	0	0	0	0	0	0	0	0	0
Ranunculaceae	Eranthis	pinnatifida			nectary	Maibara City	Japan	2012/03/21	47	0	0	0	0	0	3	5	8	30	1	0	0	0	0	0	0	0	0	0	0	0	0	0	0	0	0	0	0	0	0	0	0	0	0	0	0	0	0	0	0
Ranunculaceae	Eranthis	pinnatifida			nectary	Maibara City	Japan	2012/03/30	165	0	0	0	0	0	30	36	49	48	1	1	0	0	0	0	0	0	0	0	0	0	0	0	0	0	0	0	0	0	0	0	0	0	0	0	0	0	0	0	0
Ranunculaceae	Eranthis	pinnatifida			nectary	Maibara City	Japan	2011/03/19	82	0	0	0	0	0	18	21	26	17	0	0	0	0	0	0	0	0	0	0	0	0	0	0	0	0	0	0	0	0	0	0	0	0	0	0	0	0	0	0	0
Ranunculaceae	Eranthis	pinnatifida			nectary	Maibara City	Japan	2011/03/14	153	0	0	0	0	0	4	22	42	72	10	3	0	0	0	0	0	0	0	0	0	0	0	0	0	0	0	0	0	0	0	0	0	0	0	0	0	0	0	0	0
Ranunculaceae	Eranthis	pinnatifida			nectary	Maibara City	Japan	2011/03/19	252	0	0	0	0	0	8	17	65	142	13	5	2	0	0	0	0	0	0	0	0	0	0	0	0	0	0	0	0	0	0	0	0	0	0	0	0	0	0	0	0
Ranunculaceae	Eranthis	pinnatifida			nectary	Maibara City	Japan	2012/03/21	98	0	0	0	0	0	1	8	30	42	9	2	4	1	1	0	0	0	0	0	0	0	0	0	0	0	0	0	0	0	0	0	0	0	0	0	0	0	0	0	0
Ranunculaceae	Eranthis	pinnatifida			nectary	Sasayama City	Japan	2011/03/02	184	0	0	0	0	0	6	42	56	50	23	6	0	1	0	0	0	0	0	0	0	0	0	0	0	0	0	0	0	0	0	0	0	0	0	0	0	0	0	0	0
Ranunculaceae	Eranthis	pinnatifida			nectary	Sasayama City	Japan	2011/03/10	127	0	0	0	0	0	11	13	47	42	11	3	0	0	0	0	0	0	0	0	0	0	0	0	0	0	0	0	0	0	0	0	0	0	0	0	0	0	0	0	0
Ranunculaceae	Eranthis	pinnatifida			nectary	Sasayama City	Japan	2012/03/08	239	0	0	0	0	0	4	34	61	100	31	7	2	0	0	0	0	0	0	0	0	0	0	0	0	0	0	0	0	0	0	0	0	0	0	0	0	0	0	0	0
Ranunculaceae	Eranthis	pinnatifida			tepal	Maibara City	Japan	2012/03/21	47	0	0	0	0	0	46	0	1	0	0	0	0	0	0	0	0	0	0	0	0	0	0	0	0	0	0	0	0	0	0	0	0	0	0	0	0	0	0	0	0
Ranunculaceae	Eranthis	pinnatifida			tepal	Maibara City	Japan	2012/03/30	167	0	0	0	0	2	160	5	0	0	0	0	0	0	0	0	0	0	0	0	0	0	0	0	0	0	0	0	0	0	0	0	0	0	0	0	0	0	0	0	0
Ranunculaceae	Eranthis	pinnatifida			tepal	Maibara City	Japan	2011/03/19	82	0	0	0	0	2	74	6	0	0	0	0	0	0	0	0	0	0	0	0	0	0	0	0	0	0	0	0	0	0	0	0	0	0	0	0	0	0	0	0	0
Ranunculaceae	Eranthis	pinnatifida			tepal	Maibara City	Japan	2011/03/14	163	0	0	0	0	5	150	8	0	0	0	0	0	0	0	0	0	0	0	0	0	0	0	0	0	0	0	0	0	0	0	0	0	0	0	0	0	0	0	0	0
Ranunculaceae	Eranthis	pinnatifida			tepal	Maibara City	Japan	2011/03/19	258	0	0	0	0	7	225	26	0	0	0	0	0	0	0	0	0	0	0	0	0	0	0	0	0	0	0	0	0	0	0	0	0	0	0	0	0	0	0	0	0
Ranunculaceae	Eranthis	pinnatifida			tepal	Maibara City	Japan	2012/03/21	101	0	0	0	0	0	80	20	1	0	0	0	0	0	0	0	0	0	0	0	0	0	0	0	0	0	0	0	0	0	0	0	0	0	0	0	0	0	0	0	0
Ranunculaceae	Eranthis	pinnatifida			tepal	Sasayama City	Japan	2011/03/02	241	0	0	0	0	14	213	12	1	1	0	0	0	0	0	0	0	0	0	0	0	0	0	0	0	0	0	0	0	0	0	0	0	0	0	0	0	0	0	0	0
Ranunculaceae	Eranthis	pinnatifida			tepal	Sasayama City	Japan	2011/03/10	136	0	0	0	0	7	122	7	0	0	0	0	0	0	0	0	0	0	0	0	0	0	0	0	0	0	0	0	0	0	0	0	0	0	0	0	0	0	0	0	0
Ranunculaceae	Eranthis	pinnatifida			tepal	Sasayama City	Japan	2012/03/08	244	0	0	0	0	11	225	7	1	0	0	0	0	0	0	0	0	0	0	0	0	0	0	0	0	0	0	0	0	0	0	0	0	0	0	0	0	0	0	0	0
Ranunculaceae	Hepatica	nobilis		japonica	tepal	Maibara City	Japan	2011/04/01	65	0	0	0	0	0	0	49	9	6	1	0	0	0	0	0	0	0	0	0	0	0	0	0	0	0	0	0	0	0	0	0	0	0	0	0	0	0	0	0	0
Ranunculaceae	Hepatica	nobilis		japonica	tepal	Maibara City	Japan	2011/04/10	183	0	0	0	0	0	0	131	25	25	0	1	0	1	0	0	0	0	0	0	0	0	0	0	0	0	0	0	0	0	0	0	0	0	0	0	0	0	0	0	0
Ranunculaceae	Ranunculus	cantoniensis			petal	Takarazuka City	Japan	2014/05/16	590	0	0	0	0	5	545	38	1	1	0	0	0	0	0	0	0	0	0	0	0	0	0	0	0	0	0	0	0	0	0	0	0	0	0	0	0	0	0	0	0
Ranunculaceae	Ranunculus	ficaria			petal	Minoo City	Japan	2014/03/18	149	0	0	0	0	0	0	0	0	27	79	33	10	0	0	0	0	0	0	0	0	0	0	0	0	0	0	0	0	0	0	0	0	0	0	0	0	0	0	0	0
Ranunculaceae	Ranunculus	ficaria			petal	Minoo City	Japan	2014/04/03	471	0	0	0	0	0	0	0	0	169	219	67	15	1	0	0	0	0	0	0	0	0	0	0	0	0	0	0	0	0	0	0	0	0	0	0	0	0	0	0	0
Ranunculaceae	Ranunculus	ficaria			petal	Sasayama City	Japan	2011/04/13	157	0	0	0	0	0	0	0	1	109	42	3	2	0	0	0	0	0	0	0	0	0	0	0	0	0	0	0	0	0	0	0	0	0	0	0	0	0	0	0	0
Ranunculaceae	Ranunculus	ficaria			petal	Sasayama City	Japan	2011/04/25	301	0	0	0	0	0	0	0	2	189	92	17	1	0	0	0	0	0	0	0	0	0	0	0	0	0	0	0	0	0	0	0	0	0	0	0	0	0	0	0	0
Ranunculaceae	Ranunculus	ficaria			petal	Sasayama City	Japan	2014/04/22	234	0	0	0	0	0	0	0	3	160	62	5	4	0	0	0	0	0	0	0	0	0	0	0	0	0	0	0	0	0	0	0	0	0	0	0	0	0	0	0	0
Ranunculaceae	Ranunculus	japonicus			petal	Mimasaka City	Japan	2014/04/25	129	0	0	0	0	0	48	50	22	8	0	1	0	0	0	0	0	0	0	0	0	0	0	0	0	0	0	0	0	0	0	0	0	0	0	0	0	0	0	0	0
Ranunculaceae	Ranunculus	japonicus			petal	Mt. Ibuki	Japan	2011/05/25	1552	0	0	0	0	0	1492	48	11	1	0	0	0	0	0	0	0	0	0	0	0	0	0	0	0	0	0	0	0	0	0	0	0	0	0	0	0	0	0	0	0
Ranunculaceae	Ranunculus	japonicus			petal	Minoo City	Japan	2010/4/21	249	0	0	0	0	0	184	31	25	4	5	0	0	0	0	0	0	0	0	0	0	0	0	0	0	0	0	0	0	0	0	0	0	0	0	0	0	0	0	0	0
Ranunculaceae	Ranunculus	japonicus			petal	Nose Town	Japan	2011/05/09	722	0	0	0	0	4	671	32	11	2	1	1	0	0	0	0	0	0	0	0	0	0	0	0	0	0	0	0	0	0	0	0	0	0	0	0	0	0	0	0	0
Ranunculaceae	Ranunculus	japonicus			petal	Nose Town	Japan	2011/05/09	2127	0	0	0	0	6	2066	47	7	1	0	0	0	0	0	0	0	0	0	0	0	0	0	0	0	0	0	0	0	0	0	0	0	0	0	0	0	0	0	0	0
Ranunculaceae	Ranunculus	japonicus			petal	Nose Town	Japan	2011/05/09	2002	0	0	0	0	4	1918	65	10	4	1	0	0	0	0	0	0	0	0	0	0	0	0	0	0	0	0	0	0	0	0	0	0	0	0	0	0	0	0	0	0
Ranunculaceae	Ranunculus	japonicus			petal	Nose Town	Japan	2011/05/20	2216	0	0	0	0	4	2100	87	19	5	1	0	0	0	0	0	0	0	0	0	0	0	0	0	0	0	0	0	0	0	0	0	0	0	0	0	0	0	0	0	0
Ranunculaceae	Ranunculus	japonicus			petal	Nose Town	Japan	2011/05/20	474	0	0	0	0	1	430	31	10	2	0	0	0	0	0	0	0	0	0	0	0	0	0	0	0	0	0	0	0	0	0	0	0	0	0	0	0	0	0	0	0
Ranunculaceae	Ranunculus	japonicus			petal	Nose Town	Japan	2011/05/20	2886	0	0	0	0	9	2814	55	5	1	1	0	1	0	0	0	0	0	0	0	0	0	0	0	0	0	0	0	0	0	0	0	0	0	0	0	0	0	0	0	0
Ranunculaceae	Ranunculus	japonicus			petal	Nose Town	Japan	2011/05/20	2053	0	0	0	0	2	1982	50	16	2	1	0	0	0	0	0	0	0	0	0	0	0	0	0	0	0	0	0	0	0	0	0	0	0	0	0	0	0	0	0	0
Ranunculaceae	Ranunculus	japonicus			petal	Nose Town	Japan	2014/05/02	1287	0	0	0	0	4	1200	66	12	5	0	0	0	0	0	0	0	0	0	0	0	0	0	0	0	0	0	0	0	0	0	0	0	0	0	0	0	0	0	0	0
Ranunculaceae	Ranunculus	japonicus			petal	Nose Town	Japan	2014/05/02	416	0	0	0	0	4	400	9	1	2	0	0	0	0	0	0	0	0	0	0	0	0	0	0	0	0	0	0	0	0	0	0	0	0	0	0	0	0	0	0	0
Ranunculaceae	Ranunculus	japonicus			petal	Nose Town	Japan	2014/05/02	352	0	0	0	0	0	339	7	5	1	0	0	0	0	0	0	0	0	0	0	0	0	0	0	0	0	0	0	0	0	0	0	0	0	0	0	0	0	0	0	0
Ranunculaceae	Ranunculus	japonicus			petal	Nose Town	Japan	2014/05/02	1672	0	0	0	0	5	1593	51	16	6	1	0	0	0	0	0	0	0	0	0	0	0	0	0	0	0	0	0	0	0	0	0	0	0	0	0	0	0	0	0	0
Ranunculaceae	Ranunculus	japonicus			petal	Nose Town	Japan	2014/05/02	3506	0	0	0	0	9	3297	173	19	4	4	0	0	0	0	0	0	0	0	0	0	0	0	0	0	0	0	0	0	0	0	0	0	0	0	0	0	0	0	0	0
Ranunculaceae	Ranunculus	japonicus			petal	Nose Town	Japan	2014/05/02	2189	0	0	0	0	4	2110	53	16	4	2	0	0	0	0	0	0	0	0	0	0	0	0	0	0	0	0	0	0	0	0	0	0	0	0	0	0	0	0	0	0
Ranunculaceae	Ranunculus	japonicus			petal	Nose Town	Japan	2014/05/02	594	0	0	0	0	1	509	70	11	2	1	0	0	0	0	0	0	0	0	0	0	0	0	0	0	0	0	0	0	0	0	0	0	0	0	0	0	0	0	0	0
Ranunculaceae	Ranunculus	silerifolius			petal	Nishinomiya City	Japan	2014/05/16	371	0	0	0	0	2	144	145	47	31	2	0	0	0	0	0	0	0	0	0	0	0	0	0	0	0	0	0	0	0	0	0	0	0	0	0	0	0	0	0	0
[truncated: 46 more columns]

## Sheet: Table Caption
Table S1. The Excel datasheet including all data of floral organ numbers we used for the present analysis. The sheet ``Published data" contains the data from authors listed in the file, whereas ``Original data" contains the data collected by ourselves.
Kitazawa and Fujimoto, "A Developmental Basis for Stochasticity in Floral Organ Numbers." Frontiers in Plant Scinece (2014)
http://journal.frontiersin.org/Journal/10.3389/fpls.2014.00545/
